# 1 Identification of HIV-Reservoir Cells with Reduced Susceptibility to

## 2 Antibody-Dependent Immune Response

3 Antonio Astorga-Gamaza<sup>1</sup>, Judith Grau-Expósito<sup>1</sup>, Joaquín Burgos<sup>1</sup>, Jordi Navarro<sup>1</sup>, Adrià Curran<sup>1</sup>,

4 Bibiana Planas<sup>1</sup>, Paula Suanzes<sup>1</sup>, Vicenç Falcó<sup>1</sup>, Meritxell Genescà<sup>1</sup>, and Maria J. Buzon<sup>1\*</sup>

5 <sup>1</sup>Infectious Disease Department, Hospital Universitari Vall d'Hebron, Institut de Recerca (VHIR),

6 Universitat Autònoma de Barcelona, Barcelona, Spain.

7 **Running title:** Immune resistance of HIV-infected cells to NK-ADCC killing

8 **Corresponding authors\*:** Maria J. Buzon (mariajose.buzon@vhir.org)

### 9 Abstract

10 HIV establishes a persistent infection in heterogeneous cell reservoirs, which can be maintained by  
11 different mechanisms including cellular proliferation, and represent the main obstacle to curing the  
12 infection. The expression of the Fcγ receptor CD32 has been identified as a marker of the active cell  
13 reservoirs in people on antiretroviral therapy, but if its expression has any role in conferring  
14 advantage for viral persistence is unknown. Here, we report that HIV-infected cells expressing CD32  
15 have reduced susceptibility to natural killer (NK) antibody-dependent cell cytotoxicity (ADCC) by a  
16 mechanism compatible with the suboptimal binding of HIV-specific antibodies. Infected CD32 cells  
17 have increased proliferative capacity in the presence of immune complexes, and are more resistant  
18 to strategies directed to potentiate NK function. Remarkably, reactivation of the latent reservoir  
19 from antiretroviral-treated people living with HIV increases the pool of infected CD32 cells, which  
20 are largely resistant to the ADCC immune mechanism. Thus, we report the existence of reservoir  
21 cells that evade part of the NK immune response through the expression of CD32.

22

23

24

25 **Graphical Abstract**

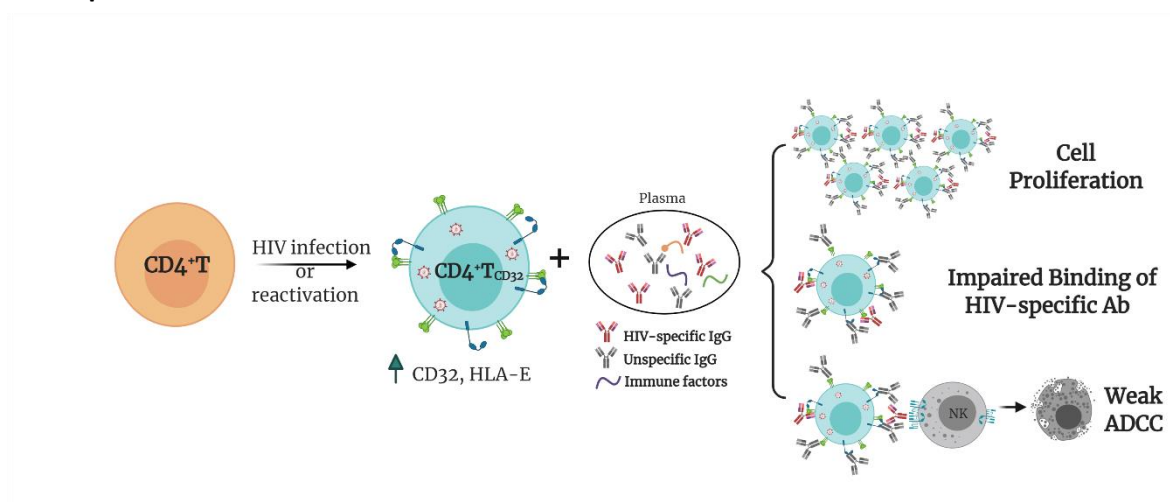

26

27 **Introduction**

28 Human immunodeficiency virus (HIV) establishes a persistent infection for which, nowadays,  
29 there is no available cure. Despite huge advances on the optimization of antiretroviral therapy (ART),  
30 which leads to suppression of viral replication, ART does not fully eliminate the virus from the human  
31 body nor can completely solve the persistent inflammation caused by HIV [1]. Importantly, ART  
32 discontinuation leads to viral rebound from diverse anatomical sites and cell subsets containing  
33 replication-competent virus, representing the main obstacle in achieving cure [2].

34 The HIV reservoir has a complex and heterogeneous nature, where each of the subsets that  
35 compose the viral reservoir contributes differently to viral persistence; i.e. central memory cells are  
36 the main population contributing to the total reservoir size [3], effector memory cells support HIV  
37 transcription [4], and memory stem cells and resident memory T cells are potentially long-lived  
38 niches for HIV [5, 6]. Unfortunately, knowledge on the establishment, maintenance, and  
39 composition of the reservoir remains incomplete, and the identification of markers to exclusively  
40 target persistent HIV-infected cells remains elusive [7, 8]. In this regard, the molecule CD32, a low-  
41 affinity receptor for the constant fraction of immunoglobulin G (FcγR-IIa), was proposed as a marker  
42 of HIV reservoir cells [9]. While those results were questioned later by the identification of  
43 experimental artifacts [10, 11], several new studies partially corroborated the original findings;  
44 higher levels of viral DNA within the T<sub>CD32</sub> population were reported after applying a very stringent  
45 cell isolation protocol [12] and CD32 was identified as a marker of transcriptionally active persistent

46 HIV-infected cells, both in blood and in the main reservoir tissues, namely the lymph nodes and the  
47 gastrointestinal tract [6, 13-16]. Importantly, whether or not CD32 is a marker of latent or  
48 transcriptionally active infection, infected CD4<sup>+</sup> T cells expressing CD32 contain replication-  
49 competent HIV and are found in long-term ART-treated people living with HIV (PLWH) [6, 9, 12-15,  
50 17, 18]. The cell markers CD20 [19] and CD30 [20] have been shown to also identify transcriptionally  
51 active HIV cells in samples from ART-suppressed PLWH. Whether these transcriptionally active HIV-  
52 infected cells persist in the body and are not targeted by host immune responses remains unknown.

53 Natural killer (NK) cells are lymphocytes that can eliminate cancer cells or virally-infected cells  
54 without prior antigen sensitization. They constitute an important arm of the immune system, not  
55 only by a direct cytotoxic effect on aberrant cells but also by the modulation of the adaptive immune  
56 responses. NK cells kill target cells by several mechanisms, such as natural cytotoxicity (NC),  
57 recognizing stress ligands expressed on the surface of infected cells, or by antibody-dependent cell  
58 cytotoxicity (ADCC), driven by antibodies that bind to target cells [21]. The decision of NK cells to kill  
59 or not to kill a target cell depends on the balance between activating and inhibitory signals received  
60 from the interaction with the target cell [22]. Among relevant NK receptors, we find natural  
61 cytotoxicity receptors such as NKp46, NKp30, NKp44, different Killer-cell immunoglobulin-like (KIRs),  
62 and lectin-like receptors such as NKG2A or NKG2C. Other important activating receptors for NK  
63 activity are NKG2D and DNAM-1, whose known ligands are the major histocompatibility complex  
64 (MHC) class I-related molecules MICA/B and the UL16-binding proteins or CD155 and CD112,  
65 respectively. Further, expression of the inhibitory receptor NKG2A is known to impact NK effector  
66 responses through its interaction with HLA-E molecules [23]. In this sense, therapeutic interventions  
67 blocking this interaction represent promising tools to potentiate NK cell immune responses during  
68 different pathologies [24, 25]. Importantly, HIV infection causes NK cell dysfunction, which is not  
69 completely restored by ART [26, 27]. NK cells play an important role in containing viral replication  
70 during early infection and shaping adaptive immune responses during chronic infection [28].  
71 However, the role of NK cells in controlling the viral reservoir in PLWH on ART remains undefined.  
72 Mounting evidence supports the importance of NK cell function in shaping the HIV reservoir size,  
73 for example through the induction of interferon (IFN- $\gamma$ ) and the expression of certain activating  
74 receptors [29]. Moreover, proportions of NK cells inversely correlated with HIV-1 DNA reservoir  
75 levels in a clinical study designed to disrupt viral latency [30]. Importantly, during chronic infection,  
76 several strategies used by HIV to evade NK cell immune responses have been described, including  
77 the modulation of HLA class I molecules expression at the surface of infected cells [31]. However,

78 immune evasion mechanisms of HIV-infected reservoir cells to NK cell-mediated killing have not  
79 been identified.

80 Here we show that CD32 expression on HIV-infected cells confers a reduced susceptibility to NK  
81 cell-mediated ADCC killing by a mechanism compatible with a reduced binding of HIV-specific  
82 antibodies required for this mechanism. Importantly, this immune-resistant mechanism is also  
83 observed in latently HIV-infected cells from ART-treated PLWH after viral reactivation, providing a  
84 plausible explanation for the maintenance of transcriptionally active HIV-infected cells in ART-  
85 treated PLWH.

86

## 87 RESULTS

### 88 Susceptibility of HIV-reservoir cell subsets to NK immune response

89 While it is clear that ADCC, largely mediated by NK cells, is an important protective mechanism  
90 against HIV and SIV infection [32-34], the capacity of this immune mechanism to limit the infection  
91 of different T cell subsets composing the viral reservoir is currently unknown. Thus, we first assessed  
92 the intrinsic susceptibility of Naïve ( $T_{NA}$ ), Stem Cell Memory ( $T_{SCM}$ ), Central Memory ( $T_{CM}$ ), Effector  
93 Memory ( $T_{EM}$ ),  $T_{CD20}^{dim}$ , and  $T_{CD32}^{dim}$   $CD4^+$  T cell subsets to ADCC response. Gp120 coated  $CD4^+$  T cells  
94 from 15 ART-treated and virologically-suppressed PLWH (participants #8-22, **Table S1**) were  
95 subjected to a flow cytometry-based ADCC assay [35]. In this assay, we used gp120-coated cells and  
96 plasma from an HIV-infected person with a high titer of HIV-specific immunoglobulins, which  
97 allowed a comparative evaluation of the intrinsic susceptibility of the different subpopulations to  
98 NK-mediated killing. Gating of CD32 cells was performed as previously reported in our previous  
99 publications [13, 6], whereby possible contaminant cell conjugates with monocytes or B cells  
100 (defined as  $CD4^+ CD32^{high}$  cells), were excluded. Coating efficiency with the recombinant protein  
101 gp120 of different cell subsets is shown in **Figure S1A**, and a representative gating strategy used for  
102 the identification of killed cells by ADCC is shown in **Figure S1B**. Results showed that each  $CD4^+$  T  
103 cell subset had a different susceptibility to autologous NK cells, being  $T_{EM} > T_{CM} >$   
104  $T_{CD20}^{dim} > T_{NA} > T_{SCM} > T_{CD32}^{dim}$  more prone to be killed (ANOVA Friedman test  $p=0.0001$ ) (**Figure 1A**).  
105 Overall, most  $CD4^+$  T cell subsets were susceptible to ADCC, however  $T_{CD32}^{dim}$  cells, and to a lesser  
106 extent  $T_{SCM}$ , showed the highest resistance to ADCC.

107 To address if the pattern observed for CD32 cells was exclusive of ART-treated PLWH, we  
108 included samples from Elite controllers (EC) and healthy donors (HD). First, we compared the  
109 expression of CD32 in CD4<sup>+</sup> T cells in the three cohorts (participants #1-22, **Table S1**), following a  
110 very stringent flow cytometry gating strategy (**Figure S1B**). In agreement with previous studies [12,  
111 13, 36, 37], we found that a median of 1.21% of CD4<sup>+</sup> T cells expressed the CD32 receptor, and no  
112 statistically significant differences were detected between ART-suppressed, EC participants and HD  
113 (**Figure S1C**). In addition, and in concordance with the study of García et al., but differing from the  
114 report of Darcis et al. [12, 37], there was no correlation between the HIV-DNA or HIV-RNA levels and  
115 the frequency of CD32 expression on CD4<sup>+</sup> T cells (**Figure S1D and S1E**). We then performed the NK-  
116 ADCC assays. We observed that overall, NK cells from healthy donors were highly efficient at killing  
117 the total CD4<sup>+</sup> T cell population (**Figure 1B**) and the different CD4<sup>+</sup> T subsets (**Figure 1C**). EC  
118 represented a heterogeneous group of individuals, in which no significant differences were detected  
119 compared to HD as a total (**Figure 1B**) or by subset (**Figure 1C**). In contrast, total CD4<sup>+</sup> T cells (**Figure**  
120 **1B**) as well as all subsets from ART-treated PLWH were less susceptible to ADCC-mediated killing  
121 than HD (**Figure 1C**). The altered frequencies, phenotypes, and decreased functions of NK cell  
122 subsets reported during HIV infection [38], which are not fully restored by ART [27], could explain  
123 the different NK potency observed in these ART-suppressed PLWH. Notably, and regardless of that,  
124 NK cells from all cohorts showed a marked impaired capacity to kill T<sub>CD32</sub><sup>dim</sup> cells (median % of ADCC  
125 of 0.00, 34.84, and 45.01, for ART, EC, and HD, respectively) (**Figure 1C and Figure S1F and S1G**). We  
126 also investigated the potential relationship between the total cell reservoir size in vivo and ADCC  
127 activity. We observed a statistically significant inverse correlation between the percentage of ADCC  
128 activity against CD4<sup>+</sup> T cells and the total HIV-DNA reservoir size (**Figure 1D**) and, in particular, for  
129 the ADCC against T<sub>CD32</sub><sup>dim</sup> cells (**Figure 1E**).

130 HIV proteins are known to alter the expression of molecules on the infected cells, thereby  
131 impacting their recognition and likely the killing mediated by immune cells. Thus, we ought to  
132 confirm our results in a more physiological setting using ex vivo infected CD4<sup>+</sup> T cells. Isolated CD4<sup>+</sup>  
133 T cells from ART-suppressed PLWH were infected with HIV<sub>BaL</sub> or HIV<sub>NL4.3</sub>, and after 5 days, were  
134 subjected to NK natural cytotoxicity (NC) and ADCC assays (participants #23-29, 36, 44, 46-49 and  
135 51, **Table S1**). A representative flow gating strategy is shown in **Figure 1F**. After the ex vivo infection,  
136 we observed higher expression of the CD32 molecule in comparison to uninfected cells (**Figure S2A**  
137 **and S2B**). Moreover, no significant differences between the killing of T<sub>CD32</sub><sup>dim</sup> and T<sub>CD32</sub><sup>neg</sup> by NC in  
138 ART-suppressed PLWH were observed (**Figure 1G**). However, and in concordance with results in

139 **Figures 1A and C**, T<sub>CD32<sup>dim</sup></sub> cells from ART-suppressed PLWH were significantly more resistant to ADCC  
140 in comparison to their negative cell counterparts (median % ADCC killing normalized to NC of 19.66  
141 vs 35.85 for T<sub>CD32<sup>dim</sup></sub> and T<sub>CD32<sup>neg</sup></sub>, respectively) (**Figure 1H**). In addition, we observed that the capacity  
142 to kill infected T<sub>CD32<sup>dim</sup></sub> cells was directly related to the global capacity to kill all infected cells,  
143 indicating the essential role of NK potency, in addition to the intrinsic susceptibility of the target  
144 cells (**Figure S2C**). These results show that, regardless of differences between individuals on the  
145 overall killing capacity of their NK cells, different subpopulations of infected CD4<sup>+</sup> T cells have distinct  
146 intrinsic susceptibility to ADCC responses, being the pool of CD4<sup>+</sup> T cells expressing the CD32  
147 molecule more resistant. Moreover, ART-suppressed individuals, most likely due to the existence of  
148 impaired NK cells, have a remarkable inability to kill this population of infected cells.

149 **Viral-reactivated cells expressing CD32 from ART-treated PLWH are resistant to NK cell-**  
150 **mediated cytotoxicity.**

151 Next, we examined if this NK-resistant profile might also affect the latent reservoir after viral  
152 reactivation. First, using samples from 9 ART-suppressed PLWH (subjects #59-67, **Table S1**), we  
153 reactivated CD4<sup>+</sup> T cells with different latency-reversing agents (LRA) and applied the Prime Flow  
154 RNA (FISH-flow) *in situ* hybridization (ISH) assay, which allows detecting at a single cell level cells  
155 expressing viral RNA, as described before [39, 40]. The gating strategy is shown in **Figure S3A**. We  
156 observed a higher increase of HIV-RNA<sup>+</sup> cells in the T<sub>CD32<sup>dim</sup></sub> fraction compared to T<sub>CD32<sup>neg</sup></sub> cells in all  
157 conditions and, within T<sub>CD32<sup>dim</sup></sub> cells, HIV-RNA<sup>+</sup> cells were more frequent after LRA treatment  
158 compared to untreated cells (**Figure 2A**). Upregulation of CD32 expression upon the treatment with  
159 several LRAs was evidenced in total CD4<sup>+</sup> T cells (**Figure S3B**). Furthermore, we performed functional  
160 NK assays using samples from 22 additional ART-suppressed PLWH after reactivation of the natural  
161 HIV reservoir (participants #68-89, **Table S1**). First, we evaluated viral reactivation by intracellular  
162 p24 (**Figure S3C**) and successfully observed viral reactivation of dormant HIV in 17 of these samples  
163 (**Figure 2B**). An example of p24 detection using this functional assay is shown in **Figure S3D**. Also in  
164 line with our previous results, we found a higher frequency of viral reactivated cells (p24<sup>+</sup> cells)  
165 within the T<sub>CD32<sup>dim</sup></sub> fraction (**Figure 2C**). After the NK killing assays, viral-reactivated cells, in general,  
166 were susceptible to ADCC (**Figure 2D**, NK + plasma condition). Of note, we used autologous plasma  
167 from the same virologically-suppressed PLWH (mean time of undetectable viremia of 60 months  
168 [range 25-118]). This is noteworthy since ART treatment may decrease the number of antibodies  
169 mediating ADCC [41]. We next evaluated the population of viral-reactivated cells expressing CD32

170 in these PLWH. We observed an increase in the expression of CD32 after latency disruption, which  
171 constituted a significant fraction of the total pool of viral reactivated cells (**Figure 2E**). Remarkably,  
172 this population was refractory to ADCC and even increased after the ADCC assays (condition with  
173 plasma) (**Figure 2F**). Thus, concordantly with previous results,  $T_{CD32}^{dim}$  cells showed a higher pattern  
174 of ADCC resistance compared to the total HIV-reactivated cells (**Figure 2G**). Altogether, our results  
175 show that the latent HIV reservoir expresses CD32 upon viral reactivation with LRAs, and the  
176 resulting  $T_{CD32}^{dim}$  infected cells are less sensitive to NK-mediated ADCC killing than the whole  
177 infected population. Importantly, antibodies endowed with ADCC-triggering capacity are still  
178 present in some ART-suppressed PLWH, yet the  $T_{CD32}^{dim}$  population might escape from this immune  
179 mechanism.

### 180 **Infected $T_{CD32}^{dim}$ cells expressing activating or inhibitory NK ligands are refractory to NK-** 181 **mediated killing**

182 To ascertain if differences in receptor-ligand interactions could be responsible for the impaired  
183 capacity of the NK cells to kill the  $T_{CD32}^{dim}$  subset, we studied the expression of MICA/B, ULBP-1,  
184 CD155, and HLA-E on the surface of HIV-infected cells after ex vivo infection. Of note, the impact of  
185 HIV infection on the expression of many of these ligands is not fully understood and seems to  
186 depend on the viral strain and the stage of the viral infection [42, 43]. Expression of the ligands was  
187 assessed by flow cytometry, and the gating strategy used for these analyses is shown in **Figure S4A**.  
188 Overall, we observed that, despite HIV induced higher expression of MICA/B, ULBP-1, and CD155 in  
189 infected cells compared to uninfected cells, only a small proportion of infected cells expressed these  
190 activating ligands (**Figure 3A and B**). In contrast, the ligand HLA-E was found to be expressed in a  
191 significantly higher proportion of infected cells (median of 12.0% in HIV-infected cells vs. 9.4% in  
192 uninfected cells,  $p=0.002$ ) (**Figure 3C and D**). By analyzing infected cells based on their expression  
193 of CD32, the same trend was observed for the receptors MICA/B, ULBP1, or CD155 (median 0.6%,  
194 1.28%, 0.37% for infected  $T_{CD32}^{dim}$  vs. 0.26%, 0.09%, 0.26% for the infected  $T_{CD32}^{neg}$  fraction) (**Figure**  
195 **3E and F**). However, HLA-E expression was 2-fold significantly higher in HIV-infected  $T_{CD32}^{dim}$   
196 compared to infected  $T_{CD32}^{neg}$  cells (median of 22.2% and 11.0% respectively,  $p<0.0001$ ) and  
197 differences in MFI were also detected (**Figure 3G and H**). Of note, in the absence of any viral  
198 infection,  $T_{CD32}^{dim}$  cells showed intrinsically higher HLA-E expression (**Figure S4B**).

199 Next, we ought to determine the expression of activating and inhibitory ligands on the fraction  
200 of cells refractory to ADCC after ex vivo infection. We performed both NC and ADCC functional



201 assays (in cells from participants #36, 40, 44, 45, 47-49, and 51, **Table S1**). The infected population  
202 (p24<sup>+</sup>) expressing the ligand ULBP-1 was significantly eliminated by both mechanisms, NC and ADCC  
203 (**Figure 3I**), however infected cells expressing MICA/B and CD155 were only eliminated by NC (**Figure**  
204 **3J and K**). Of note, as previously reported [25, 44], cells expressing the molecule HLA-E were  
205 particularly resistant to NK-mediated killing (**Figure 3L**). However, infected T<sub>CD32<sup>dim</sup></sub> cells expressing  
206 any of the activating NK ligands were more refractory to both NK-mediated immune responses  
207 (**Figure 3M-P**). Overall, we observed that upon HIV infection, target cells expressing NK-activating  
208 ligands were susceptible to natural cytotoxicity mediated by NK cells. However, infected cells  
209 expressing HLA-E and, particularly, CD32<sup>dim</sup> cells expressing this molecule and/or the activating  
210 ligands MICA/B, ULBP-1, and CD155, were more resistant to NK-mediated killing.

### 211 **Suboptimal binding of HIV-specific immunoglobulins to CD32 in HIV-infected cells inefficiently** 212 **triggers NK cell degranulation**

213 Different hypotheses might help to explain why T<sub>CD32<sup>dim</sup></sub> cells are more resistant to ADCC. CD32a  
214 is a low-affinity receptor for the constant fraction of immunoglobulin G (FcγR-IIa) [45-47], and the  
215 expression of this molecule on HIV-infected cells would provide them with a bivalent capacity to  
216 interact with immunoglobulins present in plasma, both through their constant fraction (Fc portion)  
217 or the variable fragment (antigen-specific). In addition, pentraxins, conserved innate immune  
218 molecules involved in infectious processes and inflammation, can bind to CD32 and compete with  
219 IgGs [48]. Thus, the engagement of such molecules or immune complexes (IC) to the CD32 Fc  
220 receptor might offer a selective advantage by protecting infected cells from HIV-specific ADCC-  
221 inducing antibodies. Accordingly, we tested if HIV-specific immunoglobulins (Igs) were able to  
222 efficiently bind to CD32-expressing cells previously coated with gp120. After incubation with plasma  
223 containing HIV-unspecific immunocomplexes (ICs), we found a decrease in the total number of HIV-  
224 specific molecules (A32 mAb) able to bind to T<sub>CD32<sup>dim</sup></sub> cells (**Figure 4A-B**), but such effect was not  
225 observed in the T<sub>CD32<sup>neg</sup></sub> population (**Figure 4C**). A reduction in the total number of cells being  
226 recognized by the A32 mAb was not observed (**Figure S5A-B**). This suggests that components  
227 present in plasma might bind to the FcγR receptor CD32 representing a steric hindrance and  
228 precluding further binding of HIV-specific IgGs. Alternatively, this may indicate competition between  
229 CD32 and gp120 for the binding of the same IgG.

230 We also studied the capacity of ex vivo infected CD4<sup>+</sup> T cells expressing CD32 to form ADCC-  
231 induced conjugates with NK cells. We observed a significantly higher frequency of T<sub>CD32<sup>dim</sup></sub> – NK



232 doublets compared to  $T_{CD32}^{neg}$  cells (**Figure 4D**). This could be explained by the inefficient elimination  
233 of  $T_{CD32}^{dim}$  cells by ADCC (as shown in **Figure 1H**), more likely as a consequence of suboptimal  
234 antibody-induced immune synapse. This phenomenon has been previously described in HIV-  
235 infected macrophages where increased effector-target cell contact time was associated with  
236 relative resistance to cytotoxic T lymphocytes [49]. Indeed, when we tested the capacity of FACS-  
237 sorted and gp120-coated  $T_{CD32}^{dim}$  cells to activate NK cells, we observed that these cells triggered a  
238 less potent NK degranulation than their negative counterparts (**Figure 4E**), while IFN- $\gamma$  was equally  
239 induced in both cases (**Figure S5C**). Overall, our results suggest that potential immune factors  
240 present in the plasma that are ligands of CD32 might promote a steric interference that precludes  
241 the subsequent binding of HIV-specific antibodies, leading to poor NK activation and therefore  
242 resistance to ADCC (as illustrated in **Figure 4F**).

#### 243 **HIV-infected cells expressing CD32 show higher proliferation potential after immune** 244 **complexes engagement**

245 We next explored the possibility that the engagement of IC to the CD32 molecule might induce  
246 cell proliferation, and therefore, contribute to their persistence. To study that, we performed ex  
247 vivo infection experiments and measured cell proliferation after IC engagement by flow cytometry.  
248 First, we observed that HIV-infected cells, and in particular infected cells expressing  $CD32^{dim}$ , had  
249 higher proliferative potential measured by the expression of Ki67 (median of 6.67% vs. 4.62% for  
250  $T_{CD32}^{dim}$  and  $T_{CD32}^{neg}$ , respectively) (**Figure 5A and B**). Importantly, we observed that the addition of  
251 plasma from an HIV-infected patient (containing a high titer of Igs), induced significant proliferation  
252 of infected  $T_{CD32}^{dim}$  cells (median of 7.52% vs. 12.80% for basal condition and plasma HIV<sup>+</sup>,  
253 respectively), which was abrogated when Fc receptor blockers were added to the culture (**Figure**  
254 **5C**). Of note, no effect was observed after the addition of plasma from an HIV-negative donor (**Figure**  
255 **5C**). In contrast, cell proliferation was unchanged in the infected  $T_{CD32}^{neg}$  population (**Figure 5D**).  
256 Overall, these results suggest that IC present in the plasma of PLWH could contribute to the  
257 perpetuation of the  $T_{CD32}^{dim}$  HIV-infected subset by inducing cell proliferation, besides protecting  
258 them from ADCC.

#### 259 **Effect of IL-15, IFN- $\alpha$ and anti-HLA-E antibody at enhancing the killing of HIV-infected $T_{CD32}^{dim}$** 260 **cells**

261 Given the unique properties of T<sub>CD32<sup>dim</sup></sub> cells, we further explored several strategies to potentiate  
262 its elimination by NK cells. First, we tried to directly reinvigorate NK cells from HIV-infected PLWH  
263 (#52-58, **Table S1**) culturing them with the cytokines IL-15 or IFN- $\alpha$ . As expected and previously  
264 reported [50], we observed an enhanced performance of NK cells against the total gp120-coated  
265 CD4<sup>+</sup> T cell population when treated with IL-15, and to a lesser extent with IFN- $\alpha$ . However, neither  
266 IL-15 nor IFN- $\alpha$  was able to enhance the ADCC response against T<sub>CD32<sup>dim</sup></sub> infected cells (**Figure 6A**).  
267 Moreover, we showed before that T<sub>CD32<sup>dim</sup></sub> cells express a remarkable higher levels of the NK-ligand  
268 HLA-E. Thus, using ex vivo infected cells, we performed functional assays blocking the interaction of  
269 HLA-E with its cognate receptors on NK cells by adding specific antibodies against HLA-E (participants  
270 #38, 44, and 46-51, **Table S1**). In general, the NK response was not enhanced after HLA-E blocking,  
271 either in the whole population of infected cells (p24<sup>+</sup>) (**Figure 6B**) or in the T<sub>CD32<sup>dim</sup></sub> subpopulation  
272 (**Figure 6C**). However, we observed a more potent ADCC immune response against all infected cells  
273 after blocking HLA-E (**Figure 6D**), including the infected T<sub>CD32<sup>dim</sup></sub> pool (**Figure 6E**). Remarkably, the  
274 use of an isotype control antibody also significantly enhanced the killing of all infected cells (**Figure**  
275 **6D and E**), evidencing the non-specificity of the anti-HLA-E antibody at enhancing ADCC. Thus,  
276 blocking the interaction of HLA-E with its receptors in NK cells did not specifically reverse the  
277 intrinsic immune resistance of T<sub>CD32<sup>dim</sup></sub> cells.

278

## 279 **DISCUSSION**

280 The presence of cellular and anatomical viral reservoirs, not susceptible to ART or antiviral  
281 immune responses, is the main barrier to cure the HIV infection. Thus, elucidating how these  
282 reservoirs are maintained for prolonged periods of time represents an important step towards the  
283 cure of HIV. Remarkably, we postulate a pivotal role of ADCC-NK in shaping the HIV reservoir during  
284 ART, being a novel route to avoid NK cell effector immunity by HIV-reservoir cells. We found that  
285 the expression of the molecule CD32 on productively HIV-infected cells is associated with a reduced  
286 susceptibility to ADCC activity by NK cells. Furthermore, when infected ex vivo, these cells express  
287 higher levels of the molecule HLA-E, which also limits NK-mediated killing. Last, upon interaction  
288 with immune complexes, their capacity to bind to HIV-specific antibodies decreases, while gaining  
289 the potential to proliferate. Considering that a significant proportion of HIV-latently infected cells  
290 expressed CD32 upon viral reactivation, as shown here and reported before [40], these cells will

291 indeed benefit from these described NK immune evasion mechanisms. Altogether, these factors  
292 may greatly contribute to perpetuating the persistence of the cell reservoir.

293 One of the main obstacles in the HIV cure field has been the lack of reliable markers to uniquely  
294 identify persistently infected cells. Amongst proposed molecules, we find immune checkpoint  
295 inhibitors such as PD-1 [51], the B cell surface marker CD20 [19], CD30 [20], or, more recently, a  
296 combination of several receptors [8]. However, the Fcγ receptor CD32 is perhaps one of the most  
297 promising HIV reservoir markers, since it is expressed during latent [9, 12] and transcriptionally-  
298 active infection [13, 15, 16, 52]; it has been localized in main tissue reservoirs such as the cervical  
299 tissue [6], lymph nodes [13, 16] and the gastrointestinal tract [15] and, in some cases, it has been  
300 associated with a very prominent enrichment for HIV DNA [6, 9, 12]. This molecule is typically  
301 expressed on myeloid cells or platelets, in which its function has been extensively studied [47]. While  
302 CD32 expressed on CD4<sup>+</sup> T cells is fully functional [36, 53], many questions remain unknown  
303 regarding the expression dynamics and function, in particular during HIV pathogenesis. In a recent  
304 study with SIV-infected non-human primates, CD32<sup>+</sup>CD4<sup>+</sup> T cells were strongly increased in LNs,  
305 spleen, and intestine during SIV mac infection, were enriched in markers often expressed on HIV  
306 infected cells, and contained higher levels of actively transcribed SIV RNA [52]. Consistent with  
307 previous reports [13, 37], we detected dim levels of CD32 on CD4<sup>+</sup> T cells which increased upon ex  
308 vivo HIV infection or reactivation. This result is in line with a recent publication showing the ability  
309 of cells expressing CD32 to reactivate latent HIV [12]. Moreover, tissue-resident CD4<sup>+</sup> T cells with  
310 expression of CD32 have been reported in cervical samples in the absence of infection. Importantly,  
311 this fraction of cells was intrinsically enriched for the expression of molecules related to HIV  
312 susceptibility and long-term maintenance [6]. In this sense, cell proliferation is one of the most  
313 important mechanisms of cell reservoir maintenance in long-term ART-suppressed PLWH [3, 54, 55].  
314 Importantly, we show that CD32-expressing cells had a higher proliferative potential in response to  
315 IC. Inherent proliferative capacity of this subset has recently been reported in a study demonstrating  
316 CD4<sup>+</sup> T cell activation upon CD32 ligation with antibodies or aggregated IgG [36]. Thus,  
317 understanding the mechanisms by which HIV-infected cells expressing CD32 are maintained in the  
318 human body could significantly advance the search for an HIV cure.

319 NK cells are key players in the defense against many pathogens, including HIV, being not only  
320 one of the first lines of protection but also essential modulators of the adaptive immune responses.  
321 Therefore, the acquisition of resistance mechanisms to any of the NK effector functions may

322 contribute to pathogen survival and, in the case of HIV, favor conditions for viral persistence. In this  
323 sense, it has been reported that NK cell immune pressure leads to viral sequence evolution [56], and  
324 HLA-mediated immune resistance mechanisms have been previously identified in productively HIV-  
325 infected cells [57, 58]. Moreover, resistance of reservoir cells to HIV-specific cytotoxic T cells has  
326 also been reported [59, 60], suggesting that viral persistence might be facilitated not only by cell  
327 proliferation mechanisms in the absence of viral antigen expression, but also by avoiding immune-  
328 mediated killing. NK cells recognize IgG-viral protein complexes, namely immune complexes, on  
329 infected cells via FcγRs to mediate ADCC, which is a potent mechanism to eliminate virally infected  
330 cells [61]. However, HIV has developed several strategies to evade this immune response. For  
331 instance, Vpu reduces the presence of viral antigens susceptible to recognition by antibodies on the  
332 surface of infected cells [62]. This accessory protein is responsible for the decreased expression of  
333 tetherin, a cellular host restriction factor that retains HIV virions on the cell surface, and therefore  
334 diminishes ADCC responses [62]. Moreover, Vpu and Nef downregulate CD4 expression on infected  
335 cells, preventing its interaction with Env trimers, which subsequently impedes the binding of ADCC-  
336 antibodies [63]. Overall, a proper antibody-induced immune synapse with NK cells is required to  
337 elicit a potent ADCC immune response, which depends on many factors, such as spatial  
338 configuration, valence of the antibody-epitope binding, antibody conformation, and the resulting  
339 size of the immune complex [64]. In our study, we show that the interaction of T<sub>CD32</sub><sup>dim</sup> cells with IC  
340 present in plasma lead to suboptimal binding of HIV-specific antibodies, limiting ADCC. These results  
341 suggest that potential Igs, and likely other immune mediators such as pentraxins [48], might  
342 contribute to maintaining HIV-reservoir cells through the interaction with the CD32 receptor,  
343 conferring a diminished susceptibility to ADCC activity, which intrinsically requires the presence of  
344 immune complexes. This is not the first non-desirable effect of Igs identified in the context of an  
345 infectious disease; an antibody-dependent enhancement of infection has been extensively reported  
346 for Dengue infection [65]. The intrinsic nature of antibodies, with an antigen-binding fragment (Fab)  
347 and a crystallizable fragment (Fc) as separate functional domains, adds complexity to the multiple  
348 functions and interactions that ultimately contribute to modulate immunity [66]. Importantly,  
349 increased knowledge on the Fc effector functions of IgG antibodies is greatly contributing to the  
350 design of new therapeutic strategies based on Fc-optimized monoclonal antibodies to promote  
351 effective Fc effector activities [67]. In fact, a major line of research in the field currently focuses on  
352 the use of broadly neutralizing antibodies (bNAbs) as a therapeutic or prophylactic treatment for  
353 HIV infection, relying on the efficient blocking of the virus and the triggering of potent immune

354 effector responses, for example, through FcγR interactions [68, 69]. The potentiation of the NK  
355 activity with these new approximations may help to overcome the intrinsic resistance of infected  
356 cells expressing the CD32 receptor.

357 Furthermore, as previously reported by others, HIV infection maintains or even increases the  
358 expression of the non-classical HLA-E molecule, which may contribute to the inhibition of the NK  
359 cytotoxic response [44, 70]. Interestingly, we found enrichment of HLA-E expression in the pool of  
360 HIV-infected cells expressing CD32, which could tilt the balance towards NK inhibition, therefore,  
361 conferring an additional advantage to survive. HLA-E can interact with NK cells through two  
362 receptors: NKG2A (inhibitory) and NKG2C (activating) [71]. Of note, the affinity of the NKG2A protein  
363 for HLA-E is higher than that of NKG2C [72]. Further, NKG2A<sup>+</sup> NK cells do not typically express  
364 NKG2C, thus representing a pool of NK cells that can potentially be restricted by HLA-E [73]. The  
365 effect of HLA-E suppressing immune responses has been shown in several settings, including in the  
366 context of senescence or tumors, where blocking its interaction reinvigorated effector functions [24,  
367 25]. In addition, HLA-E has been shown to impair ADCC against HIV-expressing cells, while impeding  
368 its interaction with NK cells improved the elimination of target cells [44]. Our results showed an  
369 enhancement of NK-mediated killing of CD32<sup>dim</sup> HIV-infected cells by ADCC when HLA-E was blocked.  
370 However, this potentiation was not specific, since the isotype control induced a similar effect. The  
371 killing of aberrant cells mediated by NKs is determined by a complex balance of signaling received  
372 through their multiple receptors which interact with molecules on the surface of undesired cells  
373 [22]. Thus, other molecules expressed by T<sub>CD32</sub><sup>dim</sup> cells may be contributing to elevating the threshold  
374 for NK activation needed to eliminate this cell subpopulation in these individuals.

375 In recent years, major efforts have focused on the identification of compounds to reactivate  
376 persistent HIV from its dormant state, with the ultimate goal to eliminate viral infection. However,  
377 it has become clear that the stimulation of the immune system is also a mandatory step for the  
378 elimination of persistent HIV [74]. These approaches, known as *shock and kill*, have shown little  
379 efficacy in several clinical trials in terms of HIV reservoir reactivation and the reduction of its size  
380 [75]. This failure has been attributed to both, a poor capacity of the different LRAs to reactivate all  
381 latent HIV [40], together with the dysfunction of the immune cells to kill viral reactivated cells [76].  
382 Our results show that the magnitude of the killing also depended on the potency of the NK cells,  
383 where NK cells from ART-suppressed PLWH with higher total HIV reservoir size were functionally  
384 impaired. These results are in agreement with previous reports showing that HIV chronic infection

385 has a deleterious effect on NK cell function, which is not completely restored despite ART [26, 27].  
386 To reinvigorate NK function in these subjects we treated NK cells with the cytokines IL-15 or IFN- $\alpha$ .  
387 Despite a clear immune effect on the total infected population, we did not increase the killing of  
388 T<sub>CD32</sub><sup>dim</sup> cells. A plausible explanation would be the upregulation of NKG2A on NK cells mediated by  
389 these cytokines [77, 78], which would further limit the killing of cells already expressing high levels  
390 of HLA-E, such as T<sub>CD32</sub><sup>dim</sup> cells.

391 A potential limitation of our study is the decline of HIV-specific antibody levels in ART-treated  
392 PLWH [41, 79]. Despite this decline, functional ADCC activity mediated by NK cells remains  
393 detectable in long-term virally-suppressed individuals [41]. Of relevance, we show here the  
394 existence of functional ADCC activity using plasma samples from virologically-suppressed PLWH.  
395 These antibodies induced significant NK-mediated elimination of the total pool of reactivated  
396 latently infected cells in many samples, although the subpopulation expressing CD32 was more  
397 resistant. Thus, our results suggest that, after viral reactivation, levels of HIV antigen expression  
398 susceptible to recognition by immune cells such as NK may be induced. Also, that ADCC could play  
399 a significant role in HIV persistence, highlighting the need for new strategies directed to impact  
400 resistant reservoir cells such as T<sub>CD32</sub><sup>dim</sup> cells. However, the limited number of these cells observed  
401 in vivo in ART-treated PLWH restrains their study. In this sense, the few viral-reactivated cells  
402 detected after LRA treatment from the natural latent reservoir impede an extensive assessment of  
403 infected cells expressing CD32. Further, it is unclear which is the dynamic of CD32 expression on  
404 individual cells after viral reactivation and if changes on its expression would affect ADCC activity.  
405 Last, it is possible that infected T<sub>CD32</sub><sup>dim</sup> cells are susceptible to cytotoxic CD8<sup>+</sup> T lymphocytes. Further  
406 research on these aspects are warranted. However, based on our results, we may speculate that  
407 this sort of immune resilient infected cells in vivo could certainly contribute to the source of viral  
408 rebound when ART is interrupted, or they could initiate a low level of viral replication in tissues  
409 where drugs are not able to fully penetrate. Moreover, their proliferative capacity in response to IC  
410 situates these cells as candidates for cells supporting cellular proliferation, one of the main  
411 mechanisms that perpetuate HIV reservoirs in vivo [80, 81].

412

413

414

## 415 **Materials and Methods**

### 416 **Ethics statement and patient samples**

417 PBMCs from PLWH were obtained from the HIV unit of the Hospital Universitari Vall d'Hebron in  
418 Barcelona, Spain. Study protocols were approved by the corresponding Ethical Committees  
419 (Institutional Review Board numbers PR(AG)270/2015 and PR(AG)39/2016). PBMCs from healthy  
420 donors were obtained from the Blood and Tissue Bank, Barcelona, Spain. All subjects recruited to  
421 this study were adults who provided written informed consent. Samples were completely  
422 anonymous and untraceable and were prospectively collected and cryopreserved in the Biobank  
423 (register number C.0003590). Information on plasma viral loads, CD4<sup>+</sup>T cell counts, and time on ART  
424 from suppressed PLWH is summarized in **Table S1**.

### 425 **Cells, virus, and reagents**

426 PBMCs were obtained from PLWH and uninfected donors by Ficoll-Paque density gradient  
427 centrifugation and cryopreserved in liquid nitrogen. PBMCs were cultured in RPMI medium (Gibco)  
428 supplemented with 10% Fetal Bovine Serum (Gibco), 100 µg/ml streptomycin (Fisher Scientific), and  
429 100 U/ml penicillin (Fisher Scientific) (R10 medium), and maintained at 37°C in a 5% CO<sub>2</sub> incubator.  
430 For RNA FISH-flow assays, fresh PBMCs were obtained from a whole blood donation (400ml) from  
431 PLWH by Ficoll-Paque density gradient centrifugation and CD4<sup>+</sup> T cells were immediately isolated  
432 and used without previous cryopreservation.

433 All plasmids needed for the generation of viral stocks and delta molecular clones were obtained  
434 through the NIH AIDS Reagent Program. Viral stocks were generated by transfection of 293T cells  
435 with the plasmids encoding the different molecular clones, and the resulting viral particles were  
436 titrated in TZMbl cells using an enzyme luminescence assay (britelite plus kit; PerkinElmer) as  
437 described previously [82]. BaL gp120 recombinant protein was obtained through the NIH AIDS  
438 Reagent Program. The A32 antibody was obtained through the AIDS Research and Reference  
439 Program, NIAID, NIH (Cat#11438) from Dr. James E. Robinson [83]. Interleukin-2 (IL-2) was obtained  
440 from the Vall d'Hebron Hospital pharmacy. The pan-caspase inhibitor named Q-VD-OPh (quinolyl-  
441 valyl-O-methylaspartyl-[-2,6-difluorophenoxy]-methyl ketone was purchased from Selleckchem.

### 442 **ADCC assay in cells coated with recombinant gp120**



443 PBMCs from ART-suppressed PLWH, elite controllers, or uninfected donors were thawed and  
444 rested overnight in R10 medium. To exclude monocytes, PBMCs were cultured in a lying flask and  
445 adherent cells were discarded the next day. CD4<sup>+</sup> T cells and NK cells were isolated from  
446 cryopreserved PBMCs using commercial kits (MagniSort Human CD4<sup>+</sup> T Cell Enrichment; Affymetrix,  
447 and MagniSort™ Human NK cell Enrichment; eBioscience). Two rounds of cell separation were  
448 performed to maximize the purity of the cells (overall purity >85%). CD4<sup>+</sup> T cells were stained with  
449 the membrane lipid marker PKH67 (Sigma-Aldrich) following the manufacturer's instructions, for  
450 the stable identification of these target cells, and then coated with 1 µg of recombinant gp120  
451 protein for 1h at RT. A pool of uncoated cells was used as a negative control. After coating, target  
452 cells were extensively washed in ice-cold R10 medium and dispensed in U-bottom 96-well plates  
453 (100,000 cells per well, 10 wells per condition). After that, CD4<sup>+</sup> T cells were incubated for 15 mins  
454 with plasma (1:1,000 dilution) from a viremic (high viral load in blood) HIV<sup>+</sup> patient. Then, NK  
455 effector cells were added at 1:1 target/effector ratio. Plates were centrifuged at 400xg for 3 mins  
456 and incubated for 4h at 37°C and 5% CO<sub>2</sub>. After incubation, cells were collected in FACs tubes,  
457 washed with staining buffer (PBS 3% FBS), and stained with anti-CCR7-PE-CF594 (150503, Becton  
458 Dickinson) for 30 mins at 37°C. Next, cells were washed and stained with anti-CD3-AF700 (SK7,  
459 Biolegend), anti-CD45RO-BV605 (UCHL1, Biolegend), anti-CD32-PE-Cy7 (FUN-2, Biolegend), anti-  
460 HLA-DR-BV711 (L243, Biolegend), anti-CD20-BV786 (2H7, Biolegend), and anti-CD95-PE-Cy5 (DX2,  
461 Becton Dickinson) for 20 mins at RT. Finally, cells were washed with staining buffer (PBS 3% FBS)  
462 and fixed with PFA (2%). Flow cytometry particles for absolute cell counting (5\*10<sup>4</sup>/ml) (AccuCount  
463 Blank 5.0-5.9 µm, Cytognos) were added. Samples were acquired on an LSR Fortessa flow cytometer  
464 (Becton Dickinson) and analyzed using FlowJo V10 software. We calculated the % of killing as the  
465 number of cells that disappeared in each population, following the next formula:

$$466 \quad \% \text{ ADCC} = 100 - \frac{\text{Cells (gp120)}}{\text{Cells (no gp120)}} * 100$$

467 Control cells non-coated with gp120 (no gp120 condition) but incubated with plasma allowed us to  
468 properly measure ADCC responses and rule out a possible non-specific activation of the NK cells  
469 mediated by the plasma.

470 In some experiments, we assessed the capacity of NK cells to perform ADCC after being stimulated  
471 with IFN-α or IL-15 (Miltenyi Biotec). In such cases, PBMCs were stimulated overnight with 5,000  
472 U/ml IFN-α or 25 ng/ml of IL-15, and NK cells were isolated the next day.

473 **Assessment of the gp120-coating in the different CD4<sup>+</sup> T cell subsets**

474 CD4<sup>+</sup> T cells were coated with recombinant gp120 as described above and then stained with anti-  
475 CCR7-PE-CF594 (150503, Becton Dickinson), anti-CD3-AF700 (SK7, Biolegend), anti-CD45RO-BV605  
476 (UCHL1, Biolegend), anti-CD32-PE-Cy7 (FUN-2, Biolegend), anti-HLA-DR-BV711 (L243, Biolegend),  
477 anti-CD20-BV786 (2H7, Biolegend) and anti-CD95-PE-Cy5 (DX2, Becton Dickinson) antibodies. Next,  
478 cells were incubated for 20 mins at RT with 5 µg/ml of A32 antibody (which binds to gp120 HIV  
479 protein). Then, cells were stained for 20 mins at RT with an anti-human FITC-labelled secondary  
480 antibody (dilution 1:100) (Thermo Fisher) for A32 detection. Samples were acquired on an LSR  
481 Fortessa flow cytometer and data analyzed using FlowJo.

482 **Binding assessment of HIV-specific antibodies to T<sub>CD32</sub><sup>dim</sup> cells**

483 Isolated CD4<sup>+</sup> T cells from uninfected donors were coated with gp120 recombinant protein. To  
484 detect if IC might result in steric hindrance precluding the binding of HIV-specific Igs to the T<sub>CD32</sub><sup>dim</sup>  
485 subset, we labeled the gp120-specific antibody (A32 mAb) with Allophycocyanin (APC) following the  
486 manufacturer instructions (Zenon Human IgG labeling kit, Invitrogen) and measured cell binding by  
487 flow cytometry. A pool of non-coated cells was used as a negative control. Cells were incubated with  
488 plasma containing high titer of non-HIV specific immune complexes (dilution 1,000) for 20 mins at  
489 RT. After, cells were incubated with A32-APC (3.3 µg/ml) for 25 minutes and labeled with anti-CD3-  
490 AF700 (SK7, Biolegend) and anti-CD32-PE-Cy7 (FUN-2, Biolegend). After, cells were washed once  
491 with PBS and stained with LIVE/DEAD Fixable Violet Viability (Invitrogen) for 20 mins at RT. Finally,  
492 cells were washed with PBS and fixed with PFA (2%). Samples were acquired on an LSR Fortessa flow  
493 cytometer and data analyzed using FlowJo.

494 **ADCC-mediated NK cell activation of isolated T<sub>CD32</sub><sup>dim</sup> cells.**

495 For cell sorting experiments, 100 million PBMCs from healthy donors were stained with  
496 LIVE/DEAD violet viability (Invitrogen) for 20 mins at RT. After washing, cells were surface stained  
497 with anti-CD3-PerCP (SK7; Becton Dickinson), anti-CD56-FITC (B159, Becton Dickinson), anti-CD32-  
498 PE-Cy7 (FUN-2, Biolegend) and, anti-CD4-BV605 (RPA-T4, Becton Dickinson) antibodies for 20 mins  
499 at RT. Cells were then washed and immediately sorted using a BD FACSAria Cell Sorter. We sorted  
500 the populations CD4<sup>-</sup>CD3<sup>-</sup>CD56<sup>+</sup> (NK cells), CD3<sup>+</sup>CD4<sup>+</sup>CD32<sup>+</sup> (T<sub>CD32</sub><sup>dim</sup>) and CD3<sup>+</sup>CD4<sup>+</sup>CD32<sup>-</sup> (T<sub>CD32</sub><sup>-</sup>).  
501 Then, we performed the ADCC assay and measured NK cell activation by flow cytometry. Purity of  
502 the cells was >97% in all cases.

503 Sorted T<sub>CD32</sub><sup>dim</sup> and T<sub>CD32</sub><sup>-</sup> cells were coated with recombinant gp120 as described above and  
504 incubated with plasma from a viremic HIV-infected patient at 1:1,000 dilution 15 minutes before  
505 the addition of NK cells (ratio 1:2). Co-cultures were maintained for 4 h in a 96-well plate at 37°C  
506 and 5% CO<sub>2</sub>. NK cytotoxicity was assessed by measurement of CD107a and IFN- $\gamma$ . As a positive  
507 control, we included NK cells cultured with 10 ng/ml PMA plus 1  $\mu$ M ionomycin, and as a negative  
508 control, NK cells were cultured without any stimulus. CD107a-PE-Cy5 (H4A3; Beckton Dickinson), BD  
509 GolgiPlug Protein Transport Inhibitor (Becton Dickinson) and, BD GolgiStop Protein Transport  
510 Inhibitor containing monensin (Becton Dickinson) were also added to each well at the  
511 recommended concentrations at the beginning of cell culture. After incubation, cells were washed  
512 and stained with a viability dye (LIVE/DEAD Fixable Violet dead cell stain; Invitrogen). Cells were  
513 then stained with anti-CD56-FITC (B159; Becton Dickinson), anti-CD32-PE-Cy7 (FUN-2, Biolegend)  
514 and, anti-CD4-BV605 (RPA-T4, Becton Dickinson) antibodies for 20 mins at RT. After that, cells were  
515 washed and fixed and permeabilized with Fixation/Permeabilization Solution (Becton Dickinson) for  
516 20 mins at 4°C, washed with BD Perm/Wash buffer, and stained with anti-IFN- $\gamma$  AF700 (Life  
517 technologies) for 30 mins at 4°C. After washing, cells were fixed with PFA (2%) and acquired on an  
518 LSR Fortessa flow cytometer (Becton Dickinson). Flow cytometry particles for absolute cell counting  
519 ( $5 \times 10^4$ /ml) (AccuCount Blank 5.0-5.9  $\mu$ m, Cytognos) were added. Data were analyzed using FlowJo  
520 V10 software.

#### 521 **Ex vivo infection of unstimulated PBMCs**

522 PBMCs from ART-suppressed PLWH or healthy donors were thawed and incubated overnight in  
523 R10 medium containing 40 U/ml IL-2. The next day, CD4<sup>+</sup> T cells were isolated using a commercial  
524 kit (MagneSort Human CD4<sup>+</sup> T Cell Enrichment; Affymetrix) and infected by incubation for 4 h at 37°C  
525 with 156,250 or 2,500 TCID<sub>50</sub> (50% tissue culture infectious dose) of HIV<sub>NL4.3</sub> or HIV<sub>BaL</sub> viral strains,  
526 respectively. In some experiments, cells were infected by spinoculation at 1200\*g for 2 h at 37 °C  
527 (TCID<sub>50</sub> of 78,125 and 625 for HIV<sub>NL4.3</sub> and HIV<sub>BaL</sub>). Cells were then washed twice with PBS and  
528 cultured at 1 M/ml in a 96-well plate round-bottom with R10 containing 100 U/ml of IL-2 for the  
529 next 5 days. The resulting HIV-infected CD4<sup>+</sup> T cells were used for different experiments listed below.

#### 530 **Phenotyping of HIV-infected CD4<sup>+</sup> T cells**

531 HIV-infected cells were stained with LIVE/DEAD AQUA viability (Invitrogen) for 30 mins at RT.  
532 After washing once with staining buffer, cells were stained with anti-ULBP1-PerCP (170818, R&D

533 Systems), anti-CD32-PE-Cy7 (FUN-2, Biolegend), anti-CD3-PE-Cy5 (UCHT-1, Biolegend), anti-CD4-  
534 AF700 (RPA-T4, Becton Dickinson), anti-HLA-E-APC (3D12, Biolegend), anti-CD155-BV786 (TX24,  
535 Becton Dickinson) and anti-MIC A/B –BV605 (6D4, Becton Dickinson) antibodies for 20 mins at RT.  
536 Cells were then fixed and permeabilized with Fixation/Permeabilization Solution (Becton Dickinson)  
537 for 20 mins at 4 °C, washed with BD Perm/Wash buffer, and stained with anti-p24-PE (Beckman  
538 Coulter) for 20 mins on ice and 20 mins at RT. After washing with BD Perm/Wash buffer, cells were  
539 fixed with PFA (2%). Samples were acquired on an LSR Fortessa flow cytometer and data analyzed  
540 using FlowJo V10 software. Gating was performed according to the different FMO controls.

#### 541 **Assessment of the proliferative potential of T<sub>CD32</sub><sup>dim</sup> cells**

542 HIV-infected cells were incubated with plasma from a viremic HIV<sup>+</sup> patient or plasma from an  
543 uninfected healthy donor (dilution 1:1,000) for 4h at 37°C and 5% CO<sub>2</sub>. Additionally, a pool of HIV-  
544 infected cells previously treated with an Fc receptor blocker (human Fc block, Becton Dickinson) was  
545 used as a control. After incubation, cells were washed and stained with LIVE/DEAD Fixable Violet  
546 Viability (Invitrogen) for 20 mins at RT. Next, cells were washed with staining buffer and stained with  
547 anti-CCR7-PE-CF594 (150503, Becton Dickinson) for 30 mins at 37 °C. After washing, cells were  
548 stained with anti-CD56-FITC (B159, Becton Dickinson), anti-CD3-AF700 (SK7, Biolegend), anti-  
549 CD45RO-BV605 (UCHL1, Biolegend), anti-CD32-PE-Cy7 (FUN-2, Biolegend), anti-CD20-BV786 (2H7,  
550 Biolegend), anti-CD95-PE-Cy5 (DX2, Becton Dickinson), and anti-CD4-APC (OKT4, Biolegend) for 20  
551 mins at RT. Cells were then fixed and permeabilized with Fixation/Permeabilization Solution (Becton  
552 Dickinson) for 20 mins at 4°C, washed with BD Perm/Wash buffer and stained with anti-p24-PE  
553 (KC57, Beckman Coulter) for 20 mins on ice and, during the additional 30 mins at RT an anti-Ki67-  
554 BV510 (B56, Becton Dickinson) was added. Finally, cells were washed and fixed with PFA (2%).  
555 Positive cells for the ki67 marker were determined according to FMO controls. Samples were  
556 acquired in an LSR Fortessa flow cytometer (Becton Dickinson) and analyzed with FlowJo V10  
557 software.

#### 558 **Natural cytotoxicity and ADCC NK-based assays**

559 5 days after infection, HIV-infected cells were placed in a 96 round bottom well plate at 100,000  
560 cells/well (ten replicates). Autologous NK cells, previously isolated by negative selection using  
561 magnetic beads (MagniSort™ Human NK cell Enrichment Kit, eBioscience), from PBMCs thawed the  
562 day before the co-culture, were added at 1:1 ratio. For the study of the ADCC response, plasma from

563 a viremic HIV-infected patient containing a mix of antibodies targeting different HIV epitopes was  
564 added at 1:1,000 dilution to HIV-infected cells 15 minutes before the addition of NK cells. After, the  
565 plate was centrifuged at 400\*g for 3 minutes to facilitate cell contact and then incubated at 37 °C  
566 with 5% CO<sub>2</sub> for 4 h. After, cells were collected in FACs tubes, washed with PBS, and stained with  
567 LIVE/DEAD Fixable Violet Viability (Invitrogen) for 20 mins at RT. Next, cells were washed with  
568 staining buffer and stained first with anti-CCR7-PE-CF594 for 30 mins at 37 °C, and after an  
569 additional wash, with anti-CD56-FITC (B159, Becton Dickinson), anti-CD3-AF700 (SK7, Biolegend),  
570 anti-CD45RO-BV605 (UCHL1, Biolegend), anti-CD32-PE-Cy7 (FUN-2, Biolegend), anti-CD20-BV786  
571 (2H7, Biolegend), anti-CD95-PE-Cy5 (DX2, Becton Dickinson), and anti-CD4-APC (OKT4, Biolegend)  
572 antibodies for 20 mins at RT. Cells were then fixed and permeabilized with Fixation/Permeabilization  
573 Solution (Becton Dickinson) for 20 mins at 4°C, washed with BD Perm/Wash buffer, and stained with  
574 anti-p24-PE (KC57, Beckman Coulter) for 20 mins on ice and 20 mins at RT. Finally, cells were washed  
575 and fixed with PFA (2%). Flow cytometry particles for absolute cell counting (5\*10<sup>4</sup>/ml) (AccuCount  
576 Blank 5.0-5.9 µm, Cytognos) were added. We also included a non-infected condition. Gating of the  
577 CD32 subpopulation was done according to FMO controls. Samples were acquired in an LSR Fortessa  
578 flow cytometer and analyzed with FlowJo software. The percentage of ADCC killing was determined  
579 by calculating the number of cells that disappeared in each infected population, normalizing  
580 numbers to the condition of HIV-infected CD4<sup>+</sup> T cells plus NK cells (in the absence of plasma). The  
581 NC response was quantified as the reduction in the % of p24 HIV protein in T<sub>CD32</sub><sup>neg</sup> and T<sub>CD32</sub><sup>dim</sup>  
582 subsets, in comparison to the % of p24 in these subsets in basal conditions in the absence of NK  
583 cells. In the experiments assessing the effect of blocking HLA-E, HIV-infected cells were previously  
584 incubated with 10 µg/ml of anti-human HLA-E (clone 3D12, Biolegend) antibody for 20 mins at RT,  
585 or with an isotype control mouse IgG1 (Becton Dickinson). In these assays, cells were first stained  
586 with AQUA viability (Thermo Fisher), then with a panel of surface antibodies: anti-ULBP1-PerCP  
587 (170818, R&D Systems), anti-CD56-FITC (B159, Beckton Dickinson), anti-CD32-PE-Cy7 (FUN-2,  
588 Biolegend), anti-CD3-PE-Cy5 (UCHT-1, Biolegend), anti-CD4-AF700 (RPA-T4, Becton Dickinson), anti-  
589 HLA-E-APC (3D12, Biolegend), anti-CD155-BV786 (TX24, Becton Dickinson), anti-MIC A/B –BV605  
590 (6D4, Becton Dickinson); and finally intracellularly stained with anti-p24-PE (KC57, Beckman Coulter)  
591 as previously described.

592 Cell conjugates were identified by flow cytometry and quantified as follow: live lymphocytes  
593 (isolated CD4<sup>+</sup> T and NK cells) were gated after excluding contamination with B cells and monocytes.  
594 Then, HIV-infected cells were identified as p24<sup>+</sup> cells in CD3<sup>+</sup> cells, from which we selected separately

595 both, CD32<sup>dim</sup> and CD32<sup>neg</sup> cells. From CD32<sup>dim</sup> and CD32<sup>neg</sup> populations we gated cell doublets by  
596 side scatter signals, and then we determined the fraction of cell doublets composed by CD4<sup>+</sup> T cells  
597 (CD3<sup>+</sup> and CD32<sup>dim</sup> or CD32<sup>neg</sup>) and NK cells (identified as CD56<sup>+</sup> cells).

#### 598 **Detection of cells expressing HIV-1 RNA by the RNA FISH-flow assay**

599 PBMCs from nine ART-treated PLWH were obtained from a whole blood donation (400ml) and  
600 CD4<sup>+</sup> T cells were isolated by a negative selection kit (MagniSort Human CD4<sup>+</sup> T Cell Enrichment;  
601 eBioscience). At least 6x10<sup>6</sup> of freshly-isolated CD4<sup>+</sup> T cells were studied per condition, being  
602 subjected to viral reactivation with different LRAs (Ingenol and Romidepsin), and including the  
603 positive (PMA plus ionomycin) and negative controls (medium condition). Before viral reactivation,  
604 cells were pre-incubated with the pan-caspase inhibitor Q-VD-OPh (Selleckchem) for 2h. In addition,  
605 to prevent new rounds of viral infection during HIV reactivation, the cells were treated with LRAs in  
606 the presence of Raltegravir (1 $\mu$ M) for 22h. Afterward, the RNA FISH-flow assay was performed  
607 according to the manufacturer's instructions (Human PrimerFlow RNA Assay, eBioscience) with  
608 some modifications as previously described [39]. Briefly, after antibody staining and cell fixation and  
609 permeabilization, cells were ready for hybridization with a set of 50 probes spanning the whole Gag-  
610 Pol HIV mRNA sequence (bases 1165 to 4402 of the HXB2 consensus genome). Next, the cells were  
611 subjected to amplification signal steps, and HIV RNA was detected using Alexa Fluor 647-labeled  
612 probes. In these experiments, for surface antigen labeling, anti-human CD3 (AF700, Biolegend), anti-  
613 human CD32 (PE-Cy7, Biolegend), anti-human CD20 (BV785, Biolegend), and anti-human HLA-DR  
614 (BV711, Biolegend) antibodies were used, and cell viability analyzed with violet viability dye  
615 (Invitrogen). Samples were analyzed with the LSR Fortessa flow cytometer, and the results were  
616 analyzed with FlowJo v10 software.

#### 617 **Ex vivo viral reactivation of the natural reservoir from ART-suppressed PLWH.**

618 CD4<sup>+</sup> T lymphocytes from ART-suppressed PLWH were isolated as described above and cultured  
619 in R10 medium with Q-VD-OPh (Selleckchem) for 2h in the presence of Raltegravir (1  $\mu$ M), Darunavir  
620 (1  $\mu$ M), and Nevirapine (1  $\mu$ M) to prevent new rounds of viral infection. After 2h, PMA plus  
621 ionomycin (PMA 81 nM; ionomycin 1  $\mu$ M) were added to the cell culture as a latency reversal agent  
622 and left for 18h to reactivate latent HIV. After viral reactivation, cells were subjected to cytotoxicity  
623 and ADCC assays as previously described here. For these experiments, we used the autologous  
624 plasma from each patient. After, cells were stained with LIVE/DEAD Far Red viability for 20 minutes

625 at RT and then with anti-CD32 (FITC, Biolegend) and anti-CD3 (PerCP, Becton Dickinson) antibodies  
626 for 20 minutes at RT. After the cell surface staining, cells were fixed and permeabilized with  
627 Fixation/Permeabilization Solution (Becton Dickinson) for 20 mins at 4°C, washed with BD  
628 Perm/Wash buffer, and stained with anti-p24-PE (Beckman Coulter) for 20 mins on ice and 20 mins  
629 at RT. Finally, cells were washed and fixed with PFA (2%). Samples were acquired in a FACSCalibur  
630 flow cytometer (Becton Dickinson) and analyzed with FlowJo V10 software. The limit of detection  
631 of the assay was established at 50 p24<sup>+</sup> cells/million CD4<sup>+</sup> T cells (**Figure S3C**).

### 632 **Quantification of HIV DNA and HIV RNA by quantitative PCR**

633 CD4<sup>+</sup> T lymphocytes were enriched from total PBMCs using a negative selection kit (MagneSort  
634 Human CD4<sup>+</sup> T Cell Enrichment, eBioscience). Then, CD4<sup>+</sup> T cells were fractioned to extract RNA or  
635 quantify the HIV DNA from cell lysates. CD4<sup>+</sup> T cells for DNA analysis were immediately lysed with  
636 proteinase K-containing lysis buffer (at 55°C overnight and 95°C for 5 minutes). The HIV DNA in the  
637 cell lysates was quantified by qPCR using primers and probes specific for the 1-LTR HIV region (LTR  
638 forward 5'-TTAAGCCTCAATAAAGCTTGCC-3', LTR reverse 5'-GTTCGGGCGCCACTGCTAG-3' and probe  
639 5' /56-FAM/CCAGAGTCA/ZEN/CACAACAGACGGGCA/31ABkFQ/ 3'). CCR5 gene was used for cell  
640 input normalization. Samples were analyzed in an Applied Biosystems 7000 Real-Time PCR System.  
641 For Viral RNA quantification, CD4<sup>+</sup> T cells were subjected to RNA extraction using the mirVana kit  
642 following the manufacturer's instructions (Ambion). Reverse transcription of RNA to cDNA was  
643 performed with SuperScriptIII (Invitrogen), and cDNA was quantified by qPCR with primers against  
644 the HIV long terminal repeat (LTR). Quantification of RNA and DNA copies was performed using a  
645 standard curve, and values were normalized to 1 million CD4<sup>+</sup> T cells.

### 646 **Statistical analyses**

647 Statistical analyses were performed with Prism software, version 6.0 (GraphPad). A P value <0.05  
648 was considered significant.

### 649 **Author contributions**

650 M.B. designed, directed, and interpreted experiments. A.A-G and J.G-E designed and performed  
651 experiments, analyzed the data, and interpreted experiments. A.A-G, J.B, J.N, A.C, B.P, P.S, M.G, and  
652 V.F were responsible for recruitment, specimen handling and storage, and related clinical data



653 collection. A.A-G and M.B wrote the initial manuscript, and all of us contributed to the editing of the  
654 manuscript.

## 655 **Acknowledgments**

656 This study was supported by the Spanish Secretariat of Science and Innovation and FEDER funds  
657 (grants SAF2015-67334-R and RTI2018-101082-B-I00 [MINECO/FEDER]), the Spanish “Ministerio de  
658 Economía y Competitividad, Instituto de Salud Carlos III” (ISCIII, PI17/01470), GeSIDA and the  
659 Spanish AIDS network Red Temática Cooperativa de Investigación en SIDA (RD16/0025/0007), the  
660 Fundació La Marató TV3 (grants 201805-10FMTV3 and 201814-10FMTV3) and the Gilead  
661 fellowships GLD19/00084 and GLD18/00008. M.B is supported by the Miguel Servet program  
662 funded by the Spanish Health Institute Carlos III (CP17/00179). A.A-G is supported by the Spanish  
663 Secretariat of Science and Innovation Ph.D. fellowship (BES-2016-076382). The funders had no role  
664 in study design, data collection, and analysis, the decision to publish, or preparation of the  
665 manuscript.

## 666 **Data Availability**

667 The authors declare that the data supporting the findings of this study are available within the  
668 paper and its supplementary information files. Source data are provided with this paper.

669

## 670 **REFERENCES**

- 671 1. Klatt, N.R., et al., *Immune activation and HIV persistence: implications for curative*  
672 *approaches to HIV infection*. Immunol Rev, 2013. **254**(1): p. 326-42.
- 673 2. Joos, B., et al., *HIV rebounds from latently infected cells, rather than from continuing low-*  
674 *level replication*. Proc Natl Acad Sci U S A, 2008. **105**(43): p. 16725-30.
- 675 3. Chomont, N., et al., *HIV reservoir size and persistence are driven by T cell survival and*  
676 *homeostatic proliferation*. Nat Med, 2009. **15**(8): p. 893-900.
- 677 4. Grau-Exposito, J., et al., *A Novel Single-Cell FISH-Flow Assay Identifies Effector Memory*  
678 *CD4(+) T cells as a Major Niche for HIV-1 Transcription in HIV-Infected Patients*. mBio, 2017.  
679 **8**(4).
- 680 5. Buzon, M.J., et al., *HIV-1 persistence in CD4+ T cells with stem cell-like properties*. Nat Med,  
681 2014. **20**(2): p. 139-42.
- 682 6. Cantero-Perez, J., et al., *Resident memory T cells are a cellular reservoir for HIV in the cervical*  
683 *mucosa*. Nat Commun, 2019. **10**(1): p. 4739.
- 684 7. Darcis, G., B. Berkhout, and A.O. Pasternak, *The Quest for Cellular Markers of HIV Reservoirs:*  
685 *Any Color You Like*. Front Immunol, 2019. **10**: p. 2251.

- 686 8. Neidleman, J., et al., *Phenotypic analysis of the unstimulated in vivo HIV CD4 T cell reservoir*.  
687 *Elife*, 2020. **9**.
- 688 9. Descours, B., et al., *CD32a is a marker of a CD4 T-cell HIV reservoir harbouring replication-*  
689 *competent proviruses*. *Nature*, 2017. **543**(7646): p. 564-567.
- 690 10. Bertagnolli, L.N., et al., *The role of CD32 during HIV-1 infection*. *Nature*, 2018. **561**(7723): p.  
691 E17-E19.
- 692 11. Perez, L., et al., *Conflicting evidence for HIV enrichment in CD32(+) CD4 T cells*. *Nature*, 2018.  
693 **561**(7723): p. E9-E16.
- 694 12. Darcis, G., et al., *CD32(+)CD4(+) T Cells Are Highly Enriched for HIV DNA and Can Support*  
695 *Transcriptional Latency*. *Cell Rep*, 2020. **30**(7): p. 2284-2296 e3.
- 696 13. Abdel-Mohsen, M., et al., *CD32 is expressed on cells with transcriptionally active HIV but*  
697 *does not enrich for HIV DNA in resting T cells*. *Sci Transl Med*, 2018. **10**(437).
- 698 14. Badia, R., et al., *CD32 expression is associated to T-cell activation and is not a marker of the*  
699 *HIV-1 reservoir*. *Nat Commun*, 2018. **9**(1): p. 2739.
- 700 15. Vasquez, J.J., et al., *CD32-RNA Co-localizes with HIV-RNA in CD3+ Cells Found within Gut*  
701 *Tissues from Viremic and ART-Suppressed Individuals*. *Pathog Immun*, 2019. **4**(1): p. 147-  
702 160.
- 703 16. Noto, A., et al., *CD32(+) and PD-1(+) Lymph Node CD4 T Cells Support Persistent HIV-1*  
704 *Transcription in Treated Aviremic Individuals*. *J Virol*, 2018. **92**(20).
- 705 17. Martin, G.E., et al., *CD32-Expressing CD4 T Cells Are Phenotypically Diverse and Can Contain*  
706 *Proviral HIV DNA*. *Front Immunol*, 2018. **9**: p. 928.
- 707 18. Gálvez, C., et al., *Atlas of the HIV-1 Reservoir in Peripheral CD4 T Cells of Individuals on*  
708 *Successful Antiretroviral Therapy*. 2021. **12**(6): p. e0307821.
- 709 19. Serra-Peinado, C., et al., *Expression of CD20 after viral reactivation renders HIV-reservoir*  
710 *cells susceptible to Rituximab*. *Nat Commun*, 2019. **10**(1): p. 3705.
- 711 20. Hogan, L.E., et al., *Increased HIV-1 transcriptional activity and infectious burden in peripheral*  
712 *blood and gut-associated CD4+ T cells expressing CD30*. *PLoS Pathog*, 2018. **14**(2): p.  
713 e1006856.
- 714 21. Vivier, E., et al., *Functions of natural killer cells*. *Nat Immunol*, 2008. **9**(5): p. 503-10.
- 715 22. Lanier, L.L., *Up on the tightrope: natural killer cell activation and inhibition*. *Nat Immunol*,  
716 2008. **9**(5): p. 495-502.
- 717 23. Bottino, C., et al., *Cellular ligands of activating NK receptors*. *Trends Immunol*, 2005. **26**(4):  
718 p. 221-6.
- 719 24. Andre, P., et al., *Anti-NKG2A mAb Is a Checkpoint Inhibitor that Promotes Anti-tumor*  
720 *Immunity by Unleashing Both T and NK Cells*. *Cell*, 2018. **175**(7): p. 1731-1743 e13.
- 721 25. Pereira, B.I., et al., *Senescent cells evade immune clearance via HLA-E-mediated NK and*  
722 *CD8(+) T cell inhibition*. *Nat Commun*, 2019. **10**(1): p. 2387.
- 723 26. Nabatanzi, R., et al., *Aberrant natural killer (NK) cell activation and dysfunction among ART-*  
724 *treated HIV-infected adults in an African cohort*. *Clin Immunol*, 2019. **201**: p. 55-60.
- 725 27. Lichtfuss, G.F., et al., *Virologically suppressed HIV patients show activation of NK cells and*  
726 *persistent innate immune activation*. *J Immunol*, 2012. **189**(3): p. 1491-9.
- 727 28. Florez-Alvarez, L., J.C. Hernandez, and W. Zapata, *NK Cells in HIV-1 Infection: From Basic*  
728 *Science to Vaccine Strategies*. *Front Immunol*, 2018. **9**: p. 2290.
- 729 29. Marras, F., et al., *Control of the HIV-1 DNA Reservoir Is Associated In Vivo and In Vitro with*  
730 *NKp46/NKp30 (CD335 CD337) Inducibility and Interferon Gamma Production by*  
731 *Transcriptionally Unique NK Cells*. *J Virol*, 2017. **91**(23).

- 732 30. Olesen, R., et al., *Innate Immune Activity Correlates with CD4 T Cell-Associated HIV-1 DNA*  
733 *Decline during Latency-Reversing Treatment with Panobinostat*. J Virol, 2015. **89**(20): p.  
734 10176-89.
- 735 31. Jost, S. and M. Altfeld, *Evasion from NK cell-mediated immune responses by HIV-1*. Microbes  
736 Infect, 2012. **14**(11): p. 904-15.
- 737 32. Alpert, M.D., et al., *ADCC develops over time during persistent infection with live-attenuated*  
738 *SIV and is associated with complete protection against SIV(mac)251 challenge*. PLoS Pathog,  
739 2012. **8**(8): p. e1002890.
- 740 33. Pollara, J., et al., *High-throughput quantitative analysis of HIV-1 and SIV-specific ADCC-*  
741 *mediating antibody responses*. Cytometry A, 2011. **79**(8): p. 603-12.
- 742 34. Haynes, B.F., et al., *Immune-correlates analysis of an HIV-1 vaccine efficacy trial*. N Engl J  
743 Med, 2012. **366**(14): p. 1275-86.
- 744 35. Gomez-Roman, V.R., et al., *A simplified method for the rapid fluorometric assessment of*  
745 *antibody-dependent cell-mediated cytotoxicity*. J Immunol Methods, 2006. **308**(1-2): p. 53-  
746 67.
- 747 36. Holgado, M.P., et al., *CD32 Ligation Promotes the Activation of CD4(+) T Cells*. Front  
748 Immunol, 2018. **9**: p. 2814.
- 749 37. Garcia, M., et al., *CD32 Expression is not Associated to HIV-DNA content in CD4 cell subsets*  
750 *of individuals with Different Levels of HIV Control*. Sci Rep, 2018. **8**(1): p. 15541.
- 751 38. Mikulak, J., et al., *Natural killer cells in HIV-1 infection and therapy*. AIDS, 2017. **31**(17): p.  
752 2317-2330.
- 753 39. Grau-Expósito J, S.-P.C., Miguel L, Navarro J, Curran A, Burgos J, Ocaña I, Ribera E, Torrella  
754 A, Planas B, Rosa Badía, Castellví J, Falcó V, Crespo M, Buzon MJ, *A Novel Single-Cell FISH-*  
755 *Flow Assay Identifies Effector Memory CD4 T cells as a Major Niche for HIV-1 Transcription*  
756 *in HIV-Infected Patients*. mBIO, 2017.
- 757 40. Grau-Exposito, J., et al., *Latency reversal agents affect differently the latent reservoir present*  
758 *in distinct CD4+ T subpopulations*. PLoS Pathog, 2019. **15**(8): p. e1007991.
- 759 41. Madhavi, V., et al., *Antibody-dependent effector functions against HIV decline in subjects*  
760 *receiving antiretroviral therapy*. J Infect Dis, 2015. **211**(4): p. 529-38.
- 761 42. Tremblay-McLean, A., et al., *Expression Profiles of Ligands for Activating Natural Killer Cell*  
762 *Receptors on HIV Infected and Uninfected CD4(+) T Cells*. Viruses, 2017. **9**(10).
- 763 43. Apps, R., et al., *HIV-1 Vpu Mediates HLA-C Downregulation*. Cell Host Microbe, 2016. **19**(5):  
764 p. 686-95.
- 765 44. Ward, J.P., M.I. Bonaparte, and E. Barker, *HLA-C and HLA-E reduce antibody-dependent*  
766 *natural killer cell-mediated cytotoxicity of HIV-infected primary T cell blasts*. AIDS, 2004.  
767 **18**(13): p. 1769-79.
- 768 45. Alevy, Y.G., J. Tucker, and T. Mohanakumar, *CD32A (Fc gamma RIIa) mRNA expression and*  
769 *regulation in blood monocytes and cell lines*. Mol Immunol, 1992. **29**(11): p. 1289-97.
- 770 46. Veri, M.C., et al., *Monoclonal antibodies capable of discriminating the human inhibitory*  
771 *Fc gamma-receptor IIB (CD32B) from the activating Fc gamma-receptor IIA (CD32A):*  
772 *biochemical, biological and functional characterization*. Immunology, 2007. **121**(3): p. 392-  
773 404.
- 774 47. Anania, J.C., et al., *The Human Fc gamma RII (CD32) Family of Leukocyte FcR in Health and*  
775 *Disease*. Front Immunol, 2019. **10**: p. 464.
- 776 48. Lu, J., et al., *Structural recognition and functional activation of Fc gamma R by innate*  
777 *pentraxins*. Nature, 2008. **456**(7224): p. 989-92.

- 778 49. Clayton, K.L., et al., *Resistance of HIV-infected macrophages to CD8(+) T lymphocyte-*  
779 *mediated killing drives activation of the immune system.* Nat Immunol, 2018. **19**(5): p. 475-  
780 486.
- 781 50. Garrido, C., et al., *Interleukin-15-Stimulated Natural Killer Cells Clear HIV-1-Infected Cells*  
782 *following Latency Reversal Ex Vivo.* J Virol, 2018. **92**(12).
- 783 51. Fromentin, R., et al., *CD4+ T Cells Expressing PD-1, TIGIT and LAG-3 Contribute to HIV*  
784 *Persistence during ART.* PLoS Pathog, 2016. **12**(7): p. e1005761.
- 785 52. Huot, N., et al., *CD32(+)CD4(+) T Cells Sharing B Cell Properties Increase With Simian*  
786 *Immunodeficiency Virus Replication in Lymphoid Tissues.* Front Immunol, 2021. **12**: p.  
787 695148.
- 788 53. Engelhardt, W., J. Matzke, and R.E. Schmidt, *Activation-dependent expression of low affinity*  
789 *IgG receptors Fc gamma RII(CD32) and Fc gamma RIII(CD16) in subpopulations of human T*  
790 *lymphocytes.* Immunobiology, 1995. **192**(5): p. 297-320.
- 791 54. Gantner, P., et al., *Single-cell TCR sequencing reveals phenotypically diverse clonally*  
792 *expanded cells harboring inducible HIV proviruses during ART.* Nat Commun, 2020. **11**(1): p.  
793 4089.
- 794 55. Simonetti, F.R., et al., *Clonally expanded CD4+ T cells can produce infectious HIV-1 in vivo.*  
795 Proc Natl Acad Sci U S A, 2016. **113**(7): p. 1883-8.
- 796 56. Alter, G., et al., *HIV-1 adaptation to NK-cell-mediated immune pressure.* Nature, 2011.  
797 **476**(7358): p. 96-100.
- 798 57. Cohen, G.B., et al., *The selective downregulation of class I major histocompatibility complex*  
799 *proteins by HIV-1 protects HIV-infected cells from NK cells.* Immunity, 1999. **10**(6): p. 661-  
800 71.
- 801 58. Bonaparte, M.I. and E. Barker, *Killing of human immunodeficiency virus-infected primary T-*  
802 *cell blasts by autologous natural killer cells is dependent on the ability of the virus to alter*  
803 *the expression of major histocompatibility complex class I molecules.* Blood, 2004. **104**(7): p.  
804 2087-94.
- 805 59. Ren, Y., et al., *BCL-2 antagonism sensitizes cytotoxic T cell-resistant HIV reservoirs to*  
806 *elimination ex vivo.* J Clin Invest, 2020. **130**(5): p. 2542-2559.
- 807 60. Huang, S.H., et al., *Latent HIV reservoirs exhibit inherent resistance to elimination by CD8+ T*  
808 *cells.* J Clin Invest, 2018. **128**(2): p. 876-889.
- 809 61. Forthal, D.N. and A. Finzi, *Antibody-dependent cellular cytotoxicity in HIV infection.* AIDS  
810 (London, England), 2018. **32**(17): p. 2439-2451.
- 811 62. Arias, J.F., et al., *Tetherin antagonism by Vpu protects HIV-infected cells from antibody-*  
812 *dependent cell-mediated cytotoxicity.* Proc Natl Acad Sci U S A, 2014. **111**(17): p. 6425-30.
- 813 63. Veillette, M., et al., *Interaction with cellular CD4 exposes HIV-1 envelope epitopes targeted*  
814 *by antibody-dependent cell-mediated cytotoxicity.* J Virol, 2014. **88**(5): p. 2633-44.
- 815 64. Murin, C.D., *Considerations of Antibody Geometric Constraints on NK Cell Antibody*  
816 *Dependent Cellular Cytotoxicity.* Front Immunol, 2020. **11**: p. 1635.
- 817 65. Martina, B.E., P. Koraka, and A.D. Osterhaus, *Dengue virus pathogenesis: an integrated view.*  
818 Clin Microbiol Rev, 2009. **22**(4): p. 564-81.
- 819 66. Lu, L.L., et al., *Beyond binding: antibody effector functions in infectious diseases.* Nat Rev  
820 Immunol, 2018. **18**(1): p. 46-61.
- 821 67. Bournazos, S. and J.V. Ravetch, *Fc gamma Receptor Function and the Design of Vaccination*  
822 *Strategies.* Immunity, 2017. **47**(2): p. 224-233.
- 823 68. Hessel, A.J., et al., *Fc receptor but not complement binding is important in antibody*  
824 *protection against HIV.* Nature, 2007. **449**(7158): p. 101-4.

- 825 69. Bournazos, S., et al., *Broadly neutralizing anti-HIV-1 antibodies require Fc effector functions*  
826 *for in vivo activity*. Cell, 2014. **158**(6): p. 1243-1253.
- 827 70. Martini, F., et al., *HLA-E up-regulation induced by HIV infection may directly contribute to*  
828 *CD94-mediated impairment of NK cells*. Int J Immunopathol Pharmacol, 2005. **18**(2): p. 269-  
829 76.
- 830 71. Kanevskiy, L., et al., *Dimorphism of HLA-E and its Disease Association*. Int J Mol Sci, 2019.  
831 **20**(21).
- 832 72. Kaiser, B.K., et al., *Structural basis for NKG2A/CD94 recognition of HLA-E*. Proc Natl Acad Sci  
833 U S A, 2008. **105**(18): p. 6696-701.
- 834 73. Brostjan, C., et al., *Differential expression of inhibitory and activating CD94/NKG2 receptors*  
835 *on NK cell clones*. J Immunol Methods, 2002. **264**(1-2): p. 109-19.
- 836 74. Ward, A.R., T.M. Mota, and R.B. Jones, *Immunological approaches to HIV cure*. Semin  
837 Immunol, 2020: p. 101412.
- 838 75. Spivak, A.M. and V. Planelles, *Novel Latency Reversal Agents for HIV-1 Cure*. Annu Rev Med,  
839 2018. **69**: p. 421-436.
- 840 76. Deng, K., et al., *Broad CTL response is required to clear latent HIV-1 due to dominance of*  
841 *escape mutations*. Nature, 2015. **517**(7534): p. 381-5.
- 842 77. Merino, A., et al., *Chronic stimulation drives human NK cell dysfunction and epigenetic*  
843 *reprogramming*. J Clin Invest, 2019. **129**(9): p. 3770-3785.
- 844 78. Mori, S., et al., *Differential regulation of human NK cell-associated gene expression following*  
845 *activation by IL-2, IFN-alpha and PMA/ionomycin*. Int J Oncol, 1998. **12**(5): p. 1165-70.
- 846 79. Jensen, S.S., et al., *HIV-Specific Antibody-Dependent Cellular Cytotoxicity (ADCC) -Mediating*  
847 *Antibodies Decline while NK Cell Function Increases during Antiretroviral Therapy (ART)*.  
848 PLoS One, 2015. **10**(12): p. e0145249.
- 849 80. Sengupta, S. and R.F. Siliciano, *Targeting the Latent Reservoir for HIV-1*. Immunity, 2018.  
850 **48**(5): p. 872-895.
- 851 81. Halvas, E.K., et al., *HIV-1 viremia not suppressible by antiretroviral therapy can originate*  
852 *from large T cell clones producing infectious virus*. J Clin Invest, 2020. **130**(11): p. 5847-5857.
- 853 82. Li, M., et al., *Genetic and neutralization properties of subtype C human immunodeficiency*  
854 *virus type 1 molecular env clones from acute and early heterosexually acquired infections in*  
855 *Southern Africa*. J Virol, 2006. **80**(23): p. 11776-90.
- 856 83. Moore, J.P., et al., *Immunochemical analysis of the gp120 surface glycoprotein of human*  
857 *immunodeficiency virus type 1: probing the structure of the C4 and V4 domains and the*  
858 *interaction of the C4 domain with the V3 loop*. J Virol, 1993. **67**(8): p. 4785-96.

859

860

861



**Table S1.** Clinical data of PLWH included in the study.

| # Patient ID | Time since HIV diagnosis (months) | CD4 Cell Count (cells/ $\mu$ l) | %CD4 | Viral Load (copies/ml) | Time on ART- VL-suppressed (months) | ART regimen     |
|--------------|-----------------------------------|---------------------------------|------|------------------------|-------------------------------------|-----------------|
| 1 (EC)       | 287                               | 1170                            | 52.8 | <50                    | -                                   | UNT             |
| 2 (EC)       | 11                                | 840                             | 23.7 | <50                    | -                                   | UNT             |
| 3 (EC)       | 51                                | 1030                            | 36.0 | <50                    | -                                   | UNT             |
| 4 (EC)       | 104                               | 1610                            | 46.0 | <50                    | -                                   | UNT             |
| 5 (EC)       | 59                                | 890                             | NA   | <50                    | -                                   | UNT             |
| 6 (EC)       | 321                               | 490                             | 20.4 | <50                    | -                                   | UNT             |
| 7 (EC)       | 189                               | 410                             | 23.2 | <50                    | -                                   | UNT             |
| 8            | 221                               | 1240                            | 40.1 | <50                    | 158                                 | EFV+TDF+3TC     |
| 9            | 373                               | 960                             | 33.7 | <50                    | 113                                 | COB+DRV         |
| 10           | 301                               | 1050                            | 27.0 | <50                    | 142                                 | COB+DRV         |
| 11           | 102                               | 1040                            | 37.0 | <50                    | 61                                  | DRV+RTV+3TC     |
| 12           | 128                               | 760                             | 28.1 | <50                    | 59                                  | 3TC+ABV+RPV     |
| 13           | 73                                | 660                             | 40.4 | <50                    | 67                                  | 3TC+ABV+NVP     |
| 14           | 333                               | 670                             | 24.1 | <50                    | 86                                  | RPV+COB+DRV     |
| 15           | 67                                | 830                             | 28.6 | <50                    | 62                                  | 3TC+ABV+RPV     |
| 16           | 142                               | 630                             | 36.0 | <50                    | 85                                  | FTC+RPV+TDF     |
| 17           | 213                               | 1000                            | 42.4 | <50                    | 76                                  | FTC+RPV+TDF     |
| 18           | 107                               | 600                             | 31.0 | <50                    | 105                                 | FTC+RPV+TDF     |
| 19           | 161                               | 1150                            | 36.5 | <50                    | 85                                  | FTC+NVP+TDF     |
| 20           | 90                                | 710                             | 38.3 | <50                    | 85                                  | FTC+TDF+COB+ATV |
| 21           | 136                               | 810                             | 44.3 | <50                    | 90                                  | 3TC+ABV+EFV     |
| 22           | 86                                | 1000                            | 37.0 | <50                    | 66                                  | FTC+RPV+TDF     |
| 23           | 319                               | 689                             | 24.5 | <50                    | 115                                 | ETV+RTG+RTV+DRV |
| 24           | 54                                | 530                             | 24.0 | <50                    | 51                                  | RTG+3TC+ABV     |
| 25           | 119                               | 750                             | 27.9 | <50                    | 97                                  | 3TC+ABV+DTG     |
| 26           | 95                                | 660                             | 49.5 | <50                    | 69                                  | ETV+FTC++TDF    |
| 27           | 323                               | 2090                            | 46.0 | <50                    | 43                                  | 3TC+ABV+DTG     |
| 28           | 240                               | NA                              | 25.6 | <50                    | 71                                  | TDF+COB+DRV     |
| 29           | 76                                | 540                             | 25.0 | <50                    | 56                                  | RPV+FTC+TDF     |
| 30           | 65                                | 570                             | 26.2 | <50                    | 62                                  | 3TC+ABV+RTG     |
| 31           | 248                               | 1050                            | 32.0 | <50                    | 84                                  | COB+DRV         |
| 32           | 293                               | 560                             | 24.4 | <50                    | 80                                  | RTG+COB+DRV     |
| 33           | 113                               | 600                             | 38.7 | <50                    | 95                                  | EFV+FTC+TDF     |
| 34           | 267                               | 570                             | 18.1 | <50                    | 98                                  | RTG+FTC+TAF     |
| 35           | 134                               | 870                             | 48.7 | <50                    | 97                                  | COB+DRV+DTG     |
| 36           | 98                                | 680                             | 54.0 | <50                    | 86                                  | 3TC+ABV+RPV     |
| 37           | 54                                | 350                             | 24.0 | <50                    | 48                                  | RTV+FTC+TDF     |
| 38           | 121                               | 850                             | 35.6 | <50                    | 88                                  | 3TC+ABV+DTG     |
| 39           | 286                               | 1060                            | 30.3 | <50                    | 82                                  | 3TC+ABV+DTG     |
| 40           | 99                                | 930                             | 46.0 | <50                    | 79                                  | RPV+FTC+TDF     |

|    |     |      |      |     |     |                 |
|----|-----|------|------|-----|-----|-----------------|
| 41 | 94  | 1160 | 31.0 | <50 | 73  | 3TC+ABV+DTG     |
| 42 | 73  | 310  | 13.3 | <50 | 67  | 3TC+ABV+RPV     |
| 43 | 99  | 450  | 25.0 | <50 | 96  | 3TC+ABV+RPV     |
| 44 | 89  | 690  | 35.2 | <50 | 85  | RPV+FTC+TDF     |
| 45 | 98  | 800  | 40.2 | <50 | 89  | FTC+RTV+TAF     |
| 46 | 63  | 660  | 29.8 | <50 | 24  | BIC+FTC+TAF     |
| 47 | 116 | 550  | 38.4 | <50 | 92  | FTC+RPV+TDF     |
| 48 | 169 | 1040 | 37.4 | <50 | 101 | 3TC+ABV+NVP     |
| 49 | 146 | 860  | 37.4 | <50 | 54  | RPV+FTC+TDF     |
| 50 | 60  | 890  | 34.5 | <50 | 55  | 3TC+ABV+DTG     |
| 51 | 40  | 570  | 27.4 | <50 | 28  | 3TC+ABV+DTG     |
| 52 | 214 | 890  | 37.0 | <50 | 99  | EFV+FTC+TDF     |
| 53 | 135 | 790  | 27.5 | <50 | 90  | RPV+FTC+TDF     |
| 54 | 90  | 640  | 24.2 | <50 | 62  | DRV+FTC+TDF+RTV |
| 55 | 193 | 890  | 34.1 | <50 | 85  | EFV+FTC+TDF     |
| 56 | 80  | 500  | 28.6 | <50 | 72  | RPV+FTC+TDF     |
| 57 | 178 | 850  | 39.5 | <50 | 81  | EFV+FTC+TDF     |
| 58 | 103 | 1170 | 44.0 | <50 | 58  | RPV+FTC+TDF     |
| 59 | 72  | 800  | 23.1 | <50 | 18  | ABV/3TC+DTG     |
| 60 | 33  | 490  | 21.0 | <50 | 28  | TDF/FTC+EVG/c   |
| 61 | 31  | 560  | 27.9 | <50 | 11  | TDF/FTC+EVG/c   |
| 62 | 49  | 1070 | 38.1 | <50 | 39  | TDF+FTC+EFV     |
| 63 | 31  | 810  | 34.7 | <50 | 22  | ABV/3TC+DTG     |
| 64 | 42  | 1150 | 37.0 | <50 | 37  | ABV/3TC+RPV     |
| 65 | 13  | 1760 | 57.7 | <50 | >13 | TDF/FTC+EVG/c   |
| 66 | 55  | 970  | NA   | <50 | 45  | ABV/3TC+DGT     |
| 67 | 168 | 540  | NA   | <50 | 54  | TDF/FTC+EVG/c   |
| 68 | 38  | 920  | 39.8 | <50 | 27  | COB+FTC+TAF+EVG |
| 69 | 83  | 730  | 34.2 | <50 | 25  | COB+FTC+TAF+EVG |
| 70 | 44  | 360  | 31.0 | <50 | 35  | RTG+3TC+ABV     |
| 71 | 116 | 590  | 23.0 | <50 | 96  | RPV+FTC+TDF     |
| 72 | 72  | 930  | 44.8 | 50  | 60  | 3TC+DTG         |
| 73 | 106 | 580  | 28.3 | <50 | 34  | BIC+FTC+TAF     |
| 74 | 97  | 640  | 29.0 | <50 | 63  | FTC+RPV+TAF     |
| 75 | 96  | 540  | 35.0 | 50  | 74  | RPV+FTC+TDF     |
| 76 | 121 | 810  | 38.4 | <50 | 45  | BIC+FTC+TAF     |
| 77 | 169 | 650  | 35.7 | <50 | 92  | 3TC+ABV+DTG     |
| 78 | 163 | 600  | 29.3 | <50 | 70  | FTC+RPV+TDF     |
| 79 | 105 | 670  | 32.1 | <50 | 103 | FTC+RPV+TDF     |
| 80 | 156 | 700  | 48.5 | <50 | 118 | COB+DRV+DTG     |
| 81 | 62  | 1420 | 44.3 | <50 | 54  | 3TC+DTG         |
| 82 | 319 | 280  | 27.0 | <50 | 70  | MRV+DRV+RTV+DTG |
| 83 | 100 | 1080 | 37.4 | <50 | 84  | RPV+FTC+TDF     |
| 84 | 51  | 860  | 31.2 | <50 | 33  | 3TC+ABV+DTG     |
| 85 | 156 | 1240 | 44.0 | <50 | 35  | BIC+FTC+TDF     |
| 86 | 158 | 990  | 48.9 | <50 | 81  | 3TC+ABV+DTG     |



bioRxiv preprint doi: <https://doi.org/10.1101/2022.02.24.481766>; this version posted February 25, 2022. The copyright holder for this preprint (which was not certified by peer review) is the author/funder. All rights reserved. No reuse allowed without permission.

|           |     |      |      |     |    |                 |
|-----------|-----|------|------|-----|----|-----------------|
| <b>87</b> | 58  | 600  | 32.1 | <50 | 56 | DTG+3TC         |
| <b>88</b> | 448 | 1420 | 44.0 | <50 | 42 | COB+DRV+RPV     |
| <b>89</b> | 31  | 480  | 31.2 | <50 | 28 | DRV+COB+FTC+TAF |

EC, Elite Controller; FTC, emtricitabine; TDF, tenofovir; NVP, nevirapine; ATV, atazanavir; 3TC, lamivudine; EFV, efavirenz; ABV, abacavir; RAL, raltegravir; EVG, elvitegravir; DTG, dolutegravir; DRV, darunavir; RPV, Rilpivirine; TAF, tenofovir alafenamida; BIC, Bictegravir; LPV, Lopinavir; /r, boosted with ritonavir; /c, boosted with cobicistat; UNT, untreated; NA: Not Available.

**Figure 1**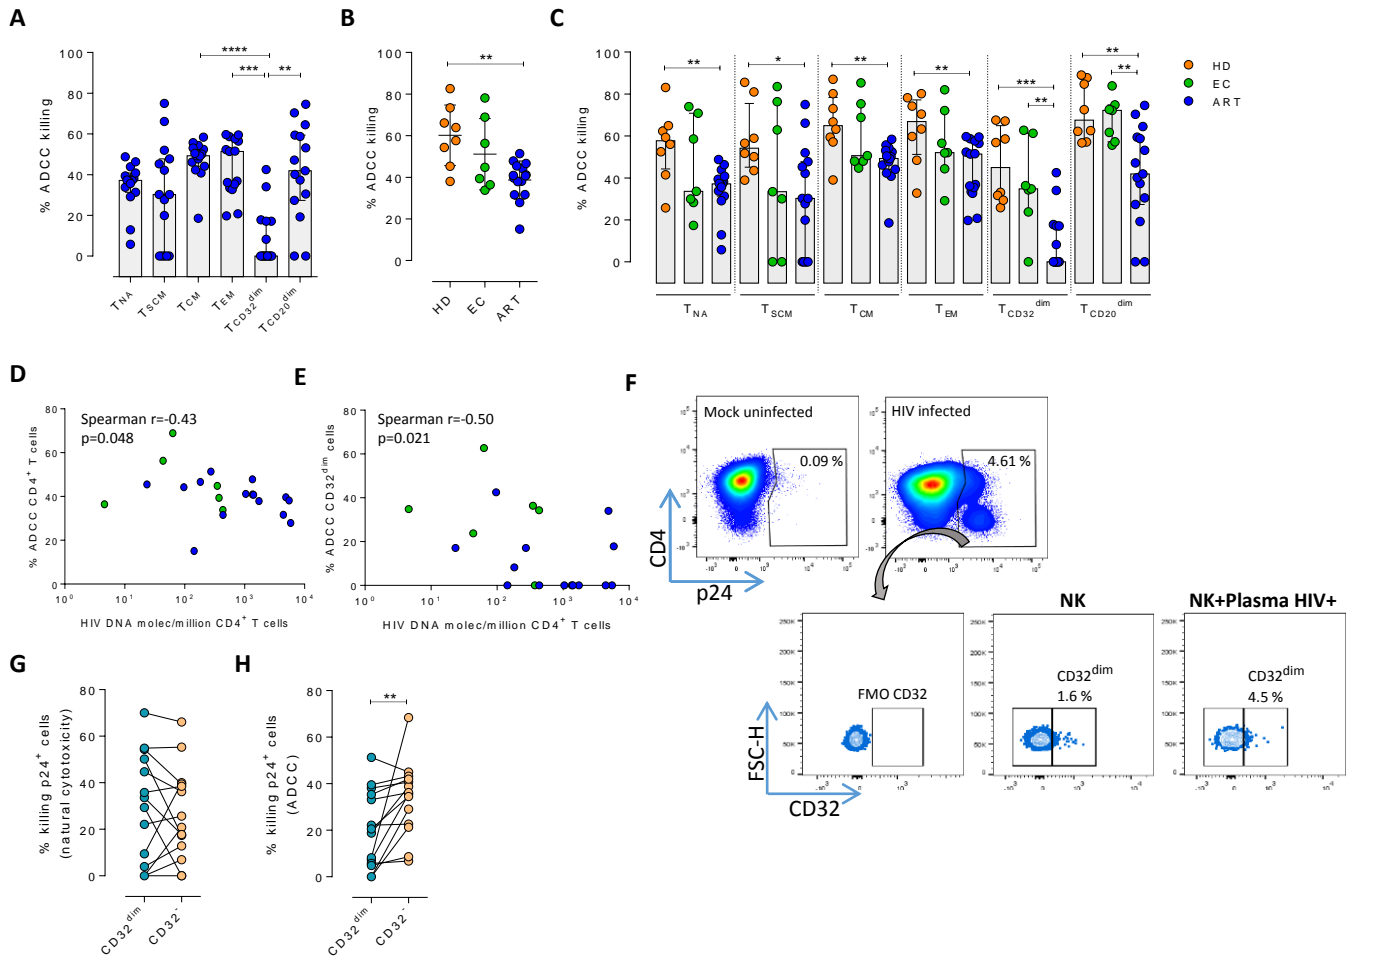

**Figure 1. Susceptibility of CD4<sup>+</sup> T cell subsets to the NK immune response.** The susceptibility of different cell subpopulations that compose the HIV-reservoir to Natural Cytotoxicity (NC) and Antibody-Dependent Cell Cytotoxicity (ADCC) mediated by NK cells was measured by performing functional assays. **A**) Percentage of gp120 coated cells killed by ADCC after being exposed to HIV-specific immunoglobulins (Igs) in the presence of NK cells. The intrinsic susceptibility to ADCC was measured in Naïve (T<sub>NA</sub>), Stem Cell Memory (T<sub>SCM</sub>), Central Memory (T<sub>CM</sub>), Effector Memory (T<sub>EM</sub>), T<sub>CD32</sub><sup>dim</sup>, and T<sub>CD20</sub><sup>dim</sup> subsets. Statistical comparisons were performed using the ANOVA Friedman test. Median with interquartile range is shown. **B**) Percentage of total gp120 coated CD4<sup>+</sup> T cells from different cohorts of patients killed by ADCC. Healthy donors (HD), Elite Controllers (EC), and antiretroviral treated PLWH (ART). Statistical comparisons were performed using the Mann-Whitney test. Median with interquartile range are shown. **C**) Percentage of cell subsets killed by ADCC in cells from HD, EC, and ART. Statistical comparisons were performed using the Mann-Whitney test. Median with interquartile range is shown. **D-E**) Spearman correlations between the size of the HIV-reservoir measured as total HIV-DNA in samples from ART-suppressed PLWH, and the potency of autologous NK cells to kill **(D)** total CD4<sup>+</sup> T cells or **(E)** T<sub>CD32</sub><sup>dim</sup> cells by ADCC. **F**) Representative flow cytometry gating strategy used to quantify HIV infection after ex vivo infection with BaL or NL4.3. Fluorescence minus one (FMO) control was used to determine CD32 expression. Cells were infected for 5 days and the frequency of expression of CD32 on HIV-infected cells was measured for each condition. **G**) Percentage of killing by NK of ex-vivo HIV-infected T<sub>CD32</sub><sup>dim</sup> and T<sub>CD32</sub><sup>-</sup> cells mediated by autologous NK cells from ART-treated PLWH (n=14). Killing was calculated by normalizing the proportion of each subset within the p24<sup>+</sup> fraction in the co-culture condition to the basal condition. **H**) Percentage of ADCC killing of ex vivo HIV-infected T<sub>CD32</sub><sup>dim</sup> and T<sub>CD32</sub><sup>-</sup> cells mediated by autologous NK cells from ART-treated PLWH (n=14). Killing was calculated by normalizing the proportion of each subset within the p24<sup>+</sup> fraction in the co-culture condition with plasma to the co-culture without plasma. Statistical comparisons were performed using the Wilcoxon matched-pairs signed rank test. \*p<0.05; \*\*p<0.01.

**Figure 2**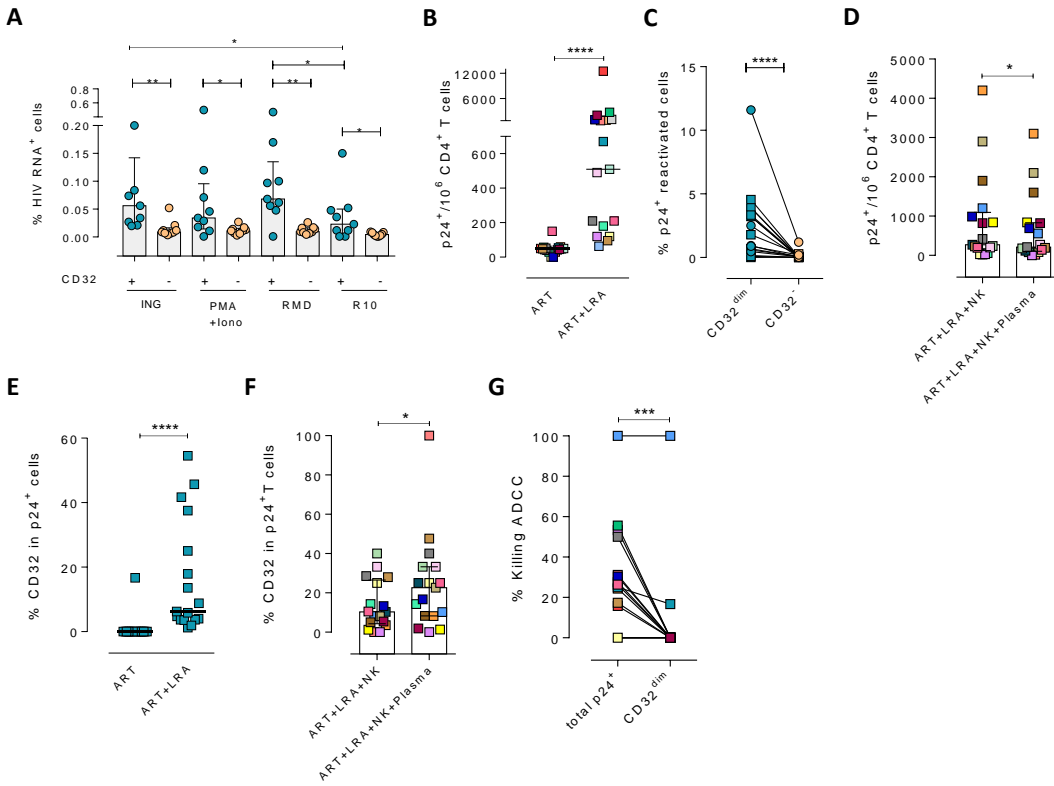

**Figure 2. Expression of HIV in T<sub>CD32</sub><sup>dim</sup> reservoir cells after latency disruption and susceptibility to NK immune responses.** Data from the direct ex vivo reactivation of the natural HIV reservoir in ART-suppressed PLWH. **A)** Percentage of HIV-RNA expressing cells, measured by the RNA FISH-flow assay, within the T<sub>CD32</sub><sup>dim</sup> and T<sub>CD32</sub><sup>-</sup> subsets after viral reactivation with Ingenol, PMA/ionomycin, or romidepsin (n=9). Median with interquartile range is represented. **B)** Percentage of p24<sup>+</sup> cells after 18h viral reactivation with PMA/ionomycin (n=17). Each participant is represented by a different color. **C)** Frequency of viral reactivation within the total pool of T<sub>CD32</sub><sup>dim</sup> and T<sub>CD32</sub><sup>-</sup> cells (n=17). **D)** NK killing assays against viral reactivated cells. Number of p24<sup>+</sup> cells per million CD4<sup>+</sup> T cells after the addition of NK cells only or together with the autologous plasma is shown (n=17). **E)** Percentage of CD32 expression within the total p24<sup>+</sup> pool before and after HIV reactivation (n=17). **F)** Percentage of T<sub>CD32</sub><sup>dim</sup> within p24<sup>+</sup> cells after HIV reactivation and functional NK-mediated assays (n=17). **G)** Percentage of NK-mediated killing by ADCC of the reactivated T<sub>CD32</sub><sup>dim</sup> or total p24<sup>+</sup> cells (n=17). ADCC was calculated as the reduction of p24<sup>+</sup> cells after the co-culture with NK and plasma and normalized to the condition with NK cells alone.

**Figure 3**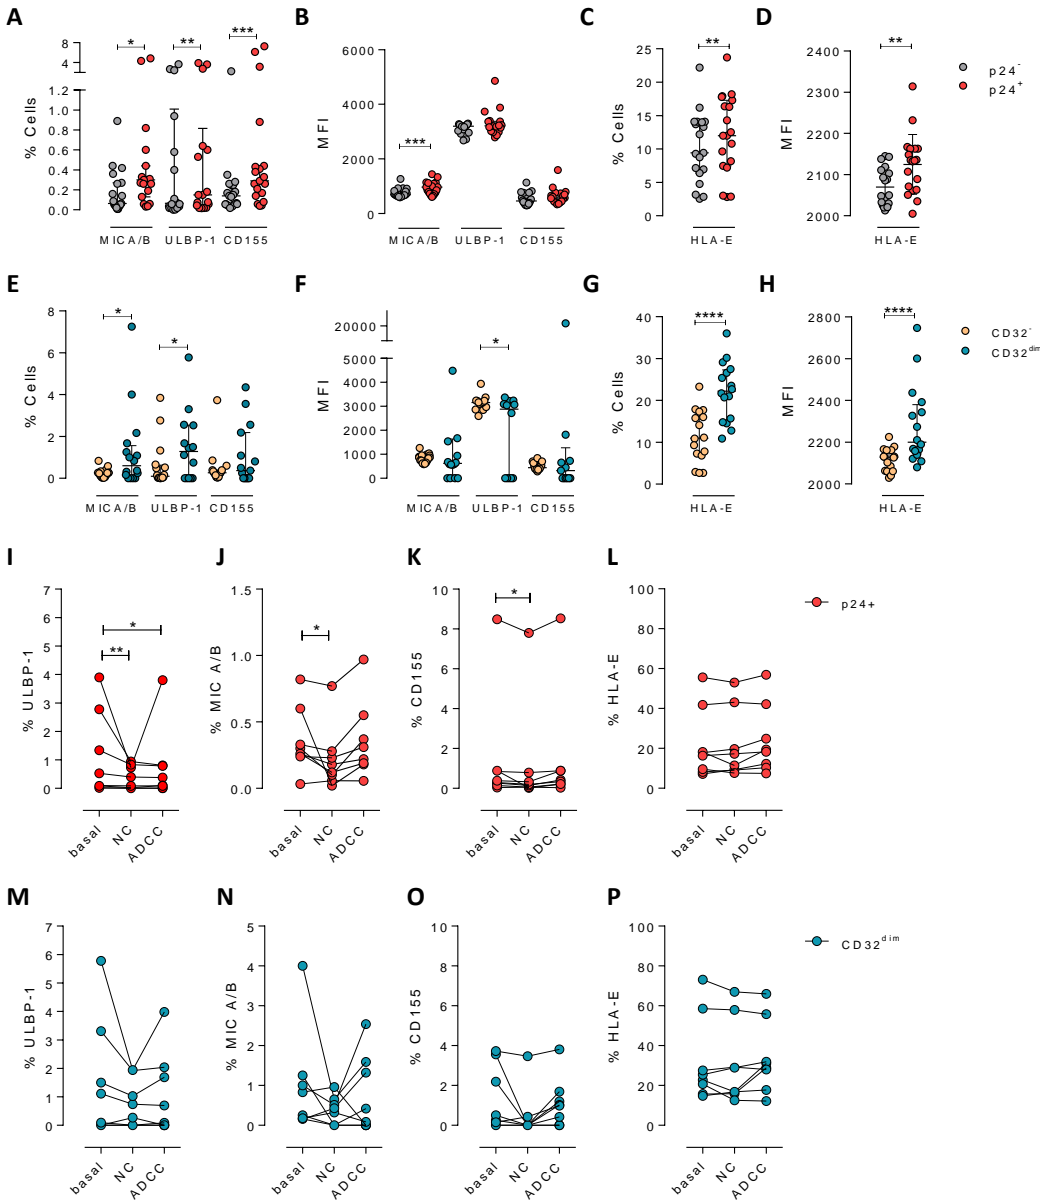

**Figure 3. Expression of NK-ligands in cells resistant to NK-mediated killing.** HIV-infected cells from healthy donors were subjected to NK-killing assays and the percentage of expression of different NK-ligands was measured by flow cytometry in different fractions (CD32<sup>-</sup> and CD32<sup>dim</sup>) of infected (p24<sup>+</sup>) or uninfected (p24<sup>-</sup>) cells. **A-H**) Expression of NK-ligands before performing the killing assays (n=19): **A**) Percentage of CD4<sup>+</sup> T cells expressing MIC A/B, ULBP-1, and CD155. **B**) Mean Fluorescence Intensity (MFI) values for the expression of MIC A/B, ULBP-1, and CD155 on CD4<sup>+</sup> T cells. **C**) Percentage of CD4<sup>+</sup> T cells expressing the MHC molecule HLA-E. **D**) MFI values for HLA-E expression on CD4<sup>+</sup> T cells. **E-H**) Same analyses as A-D but showing HIV-infected CD32<sup>dim</sup> and CD32<sup>-</sup> cells. **I-P**) Expression of NK-ligands on HIV-infected cells not killed by the different NK-killing mechanisms. Natural Cytotoxicity (NC) and Antibody-Dependent Cell Cytotoxicity (ADCC). **I-L**) Expression of NK-ligands on total infected CD4<sup>+</sup> T cells before and after NK killing. **M-P**) Expression of NK-ligands on infected T<sub>CD32<sup>dim</sup></sub> cells before and after NK killing. All graphs show median with interquartile range and the statistical comparisons were performed using the Wilcoxon matched-pairs signed rank test. \*p<0.05; \*\*p<0.01; \*\*\*p<0.001; \*\*\*\*p<0.0001.

**Figure 4**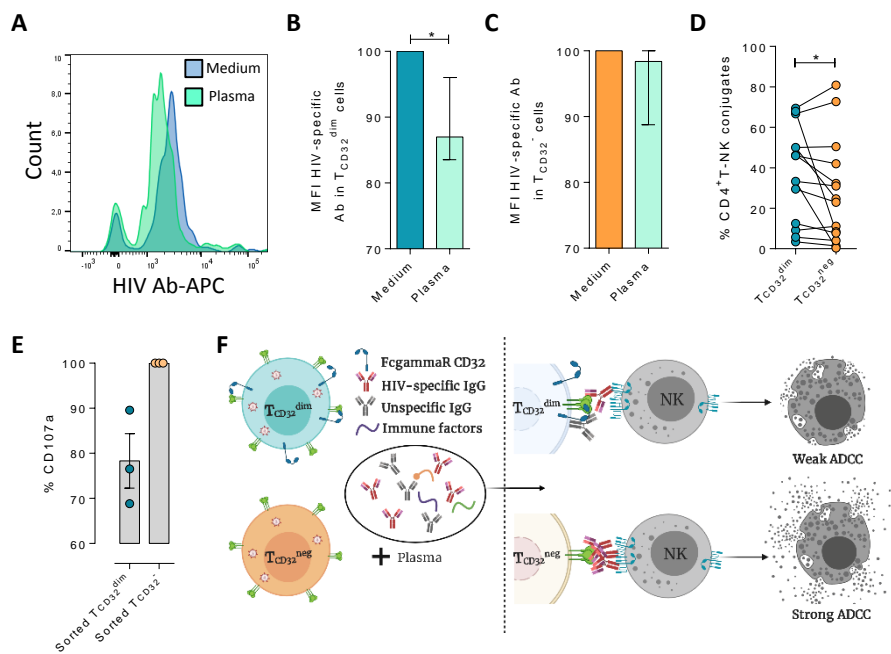

**Figure 4. Reduced binding of HIV-specific antibodies to  $T_{CD32}^{dim}$  cells and the effect on NK degranulation.** The binding capability of the HIVgp120-specific IgG A32, an antibody (Ab) labelled with allophycocyanin (APC), to gp120-coated  $T_{CD32}^{dim}$  and  $T_{CD32}^{-}$  cells from healthy donors, before and after incubation with plasma containing non-HIV specific IgGs, was measured by flow cytometry (n=7). Percentage of the Mean Fluorescence Intensity (MFI) signal, normalized to the medium, for A32<sup>+</sup> cells after plasma addition is shown in **A**) Representative histogram of A32<sup>+</sup>  $T_{CD32}^{dim}$  cells, **B**)  $T_{CD32}^{dim}$  and **C**)  $T_{CD32}^{-}$  cells. **D**) Percentage of cell conjugates between ex vivo HIV-infected  $T_{CD32}^{dim}$  or  $T_{CD32}^{-}$  and NK cells after performing ADCC assays (n=14). **E**) Percentage of NK degranulation (CD107a marker) in cell conjugates with sorted  $T_{CD32}^{dim}$  or  $T_{CD32}^{-}$  coated with gp120 HIV protein and incubated with plasma HIV<sup>+</sup>, after a 4h ADCC activation assay (n=3). Values are normalized to the CD32<sup>-</sup> population. **F**) Schematic illustration of the impaired ADCC response against  $T_{CD32}^{dim}$  cells. Graphs show median with range and statistical comparisons were performed using Wilcoxon matched-pairs signed rank test. \*p<0.05.

Figure 5

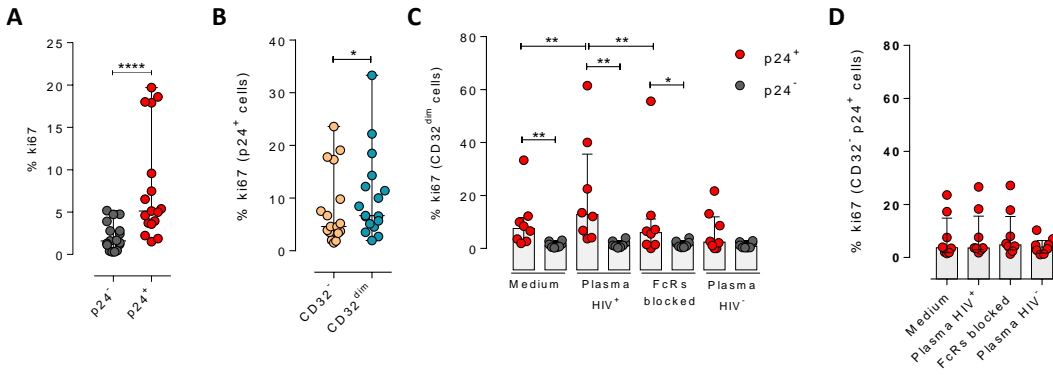

**Figure 5. Immune complexes engagement with CD32 induces proliferation in HIV-infected CD32<sup>dim</sup> cells.** Cells from healthy donors were infected with the viral strain HIV<sub>BaL</sub> and 5 days post-infection Ki67 expression was measured by flow cytometry. **A)** Expression of the proliferation marker Ki67 in uninfected or ex-vivo HIV-infected CD4<sup>+</sup> T cells. Median and ranges are shown (n=17). **B)** Percentage of Ki67<sup>+</sup> cells in HIV-infected T<sub>CD32<sup>dim</sup></sub> and T<sub>CD32<sup>-</sup></sub> subsets are shown (n=17). Median and ranges are shown. **C)** Percentage of Ki67 expression on T<sub>CD32<sup>dim</sup></sub> cells after immune complexes engagement (Plasma HIV<sup>+</sup>). Medium alone, FcRs blockers and plasma from an HIV-negative individual were included as controls. Median with interquartile range is shown (n=8). **D)** Percentage of Ki67 expression on HIV-infected T<sub>CD32<sup>-</sup></sub> cells incubated under the same experimental conditions as shown in **C**. Median with interquartile range is represented (n=8). Statistical comparisons consisted of the Wilcoxon matched-pairs signed rank test. \*p<0.05; \*\*p<0.01; \*\*\*p<0.001; \*\*\*\*p<0.0001.

**Figure 6**

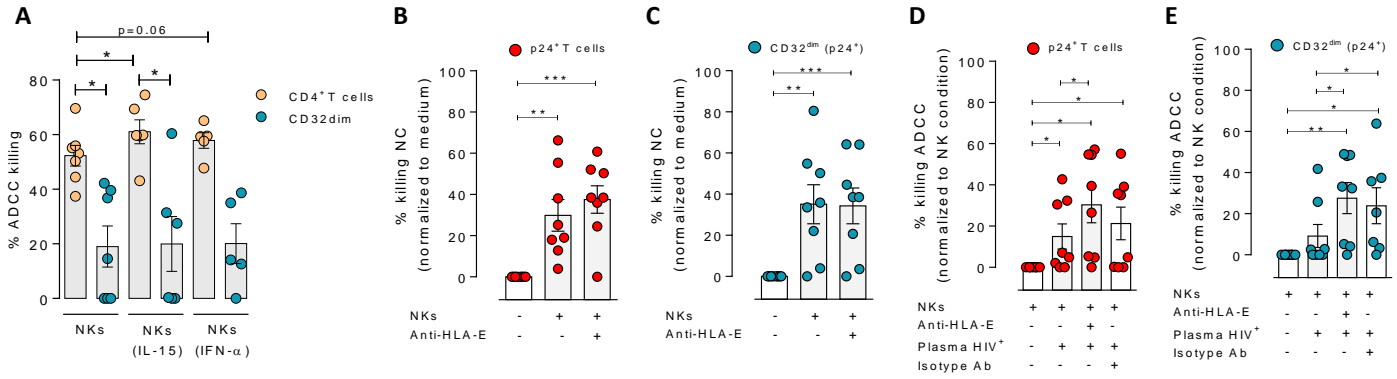

**Figure 6. Effect of IL-15, IFN- $\alpha$  and anti-HLA-E antibody in the NK function.** CD4<sup>+</sup> T cells from ART-suppressed participants, either coated with a gp120 recombinant protein (A) or, ex vivo infected with HIV<sub>NL4.3</sub> (B to E), were subjected to Natural Cytotoxicity (NC) (NK condition) and ADCC (NK + plasma) assays in the presence of cytokines or blocking antibodies. **A)** Percentage of ADCC killing of HIVgp120-coated CD4<sup>+</sup> T cells by autologous NK cells after treatment with IL-15 or IFN- $\alpha$ . Mean with SEM is represented. **B-E)** Graphs showing the percentage of reduction in HIV-infected cells after using anti-HLA-E antibodies or isotype controls in NC and ADCC functional assays (n=8), in total p24<sup>+</sup> CD4<sup>+</sup> T cells (**B** and **D**) and in T<sub>CD32<sup>dim</sup></sub> (p24<sup>+</sup>) cells (**C** and **E**). Mean with SEM is represented. Statistical comparisons consisted of the One Sample T test or the Wilcoxon matched-pairs signed rank test. \*p<0.05; \*\*p<0.01.



**Figure S1**

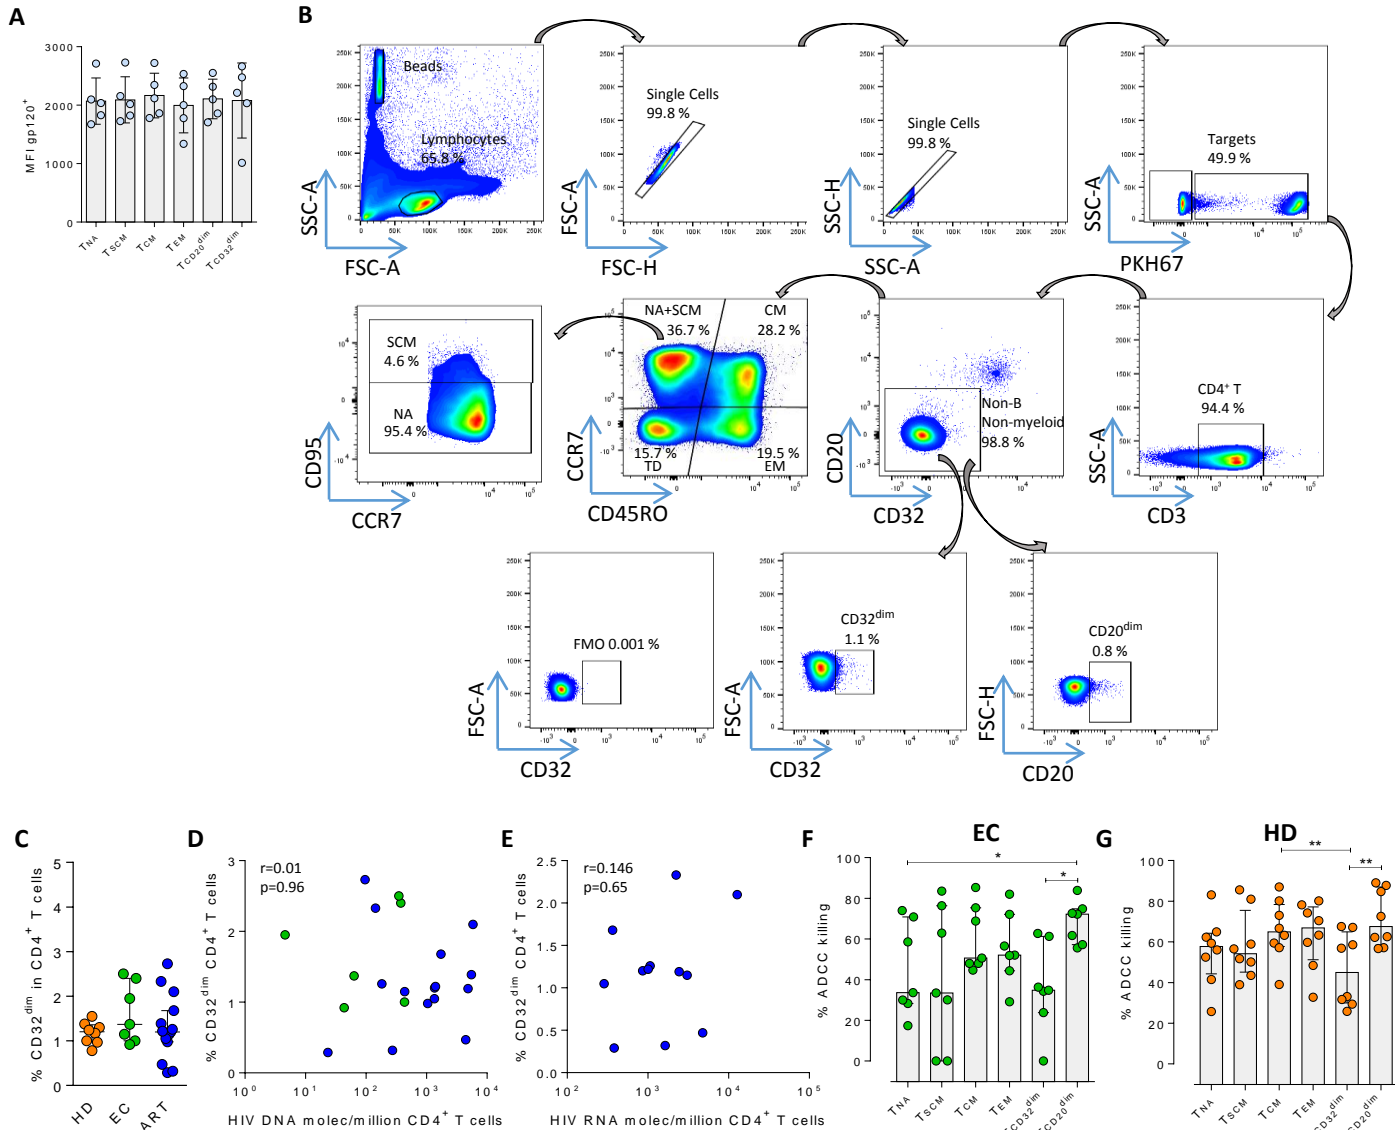

**Figure S1. Gp120 cell coating efficiency, gating strategy for the NK-killing assays, and percentages of ADCC killing in elite controllers (EC), and healthy donors (HD).** **A**) Cell coating with recombinant gp120 HIV protein. Detection was performed by flow cytometry using the anti-gp120 antibody A32, and a FITC-labelled anti-human secondary antibody. Mean Fluorescence Intensity (MFI) values are shown. **B**) Gating strategy used to identify cell killing after the ADCC assay in the different cell subsets. Cell doublets were excluded by forward and side scatter signals and B and myeloid cells discarded based on their high expression of CD20 and CD32. Beads for absolute cell counting were included to calculate ADCC killing by measuring the disappearance of cells in each cell subset. **C**) Frequency of expression measured by flow cytometry of CD32 on CD4<sup>+</sup> T cells from healthy donors (HD, n=8), Elite controllers (EC, n=7) and ART-treated and virologically-suppressed PLWH (ART, n=15). Median with interquartile range are shown. Statistical comparisons were performed using the Mann-Whitney test. \*\*\* $p<0.001$ ; \*\*\*\* $p<0.0001$ . **D-E**) Correlations of the HIV-reservoir size and CD32 expression. Spearman correlations are shown in samples from HIV-infected individuals. ART-treated and EC are shown in blue and green dots, respectively. **D**) Spearman correlation between the total HIV DNA reservoir size and the frequency of expression of CD32 in CD4<sup>+</sup> T cells. ART-treated and EC are shown in blue and green dots, respectively. **E**) Spearman correlation between HIV RNA levels in CD4<sup>+</sup> T cells and the frequency of expression of CD32 in CD4<sup>+</sup> T cells. **F-G**) Intrinsic susceptibility to NK-mediated ADCC of Naïve (T<sub>NA</sub>), Stem Cell Memory (T<sub>SCM</sub>), Central Memory (T<sub>CM</sub>), Effector Memory (T<sub>EM</sub>), T<sub>CD32<sup>dim</sup></sub> and T<sub>CD20<sup>dim</sup></sub> subsets in **F**) EC, and **G**) HD. Median with interquartile range is shown. Statistical comparisons were performed using the ANOVA Friedman test. \* $p<0.05$ ; \*\* $p<0.01$ .

**Figure S2**

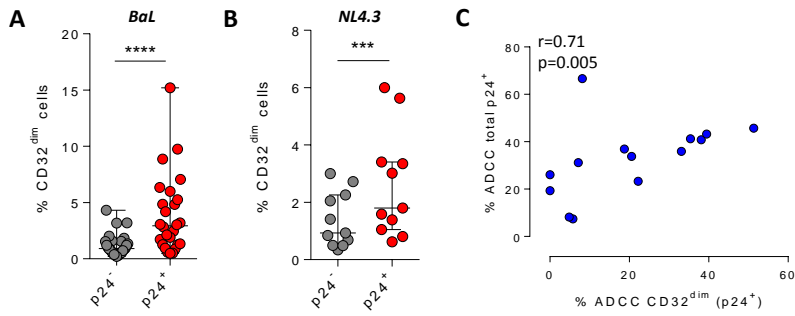

**Figure S2.** Percentage of CD32 expression on uninfected cells (p24<sup>-</sup>) and HIV-infected cells (p24<sup>+</sup>) with BaL (n=26) in **(A)** or with NL4.3 (n=11) in **(B)** after 5 days of infection. Median with interquartile range are shown. Statistical analyses consisted of the Wilcoxon matched-pairs signed rank test. **(C)** Spearman correlation between the percentage of ADCC-killing of the total HIV-infected CD4<sup>+</sup> T cells and the percentage of ADCC-killing of the T<sub>CD32<sup>dim</sup></sub> subset is shown.

**Figure S3**

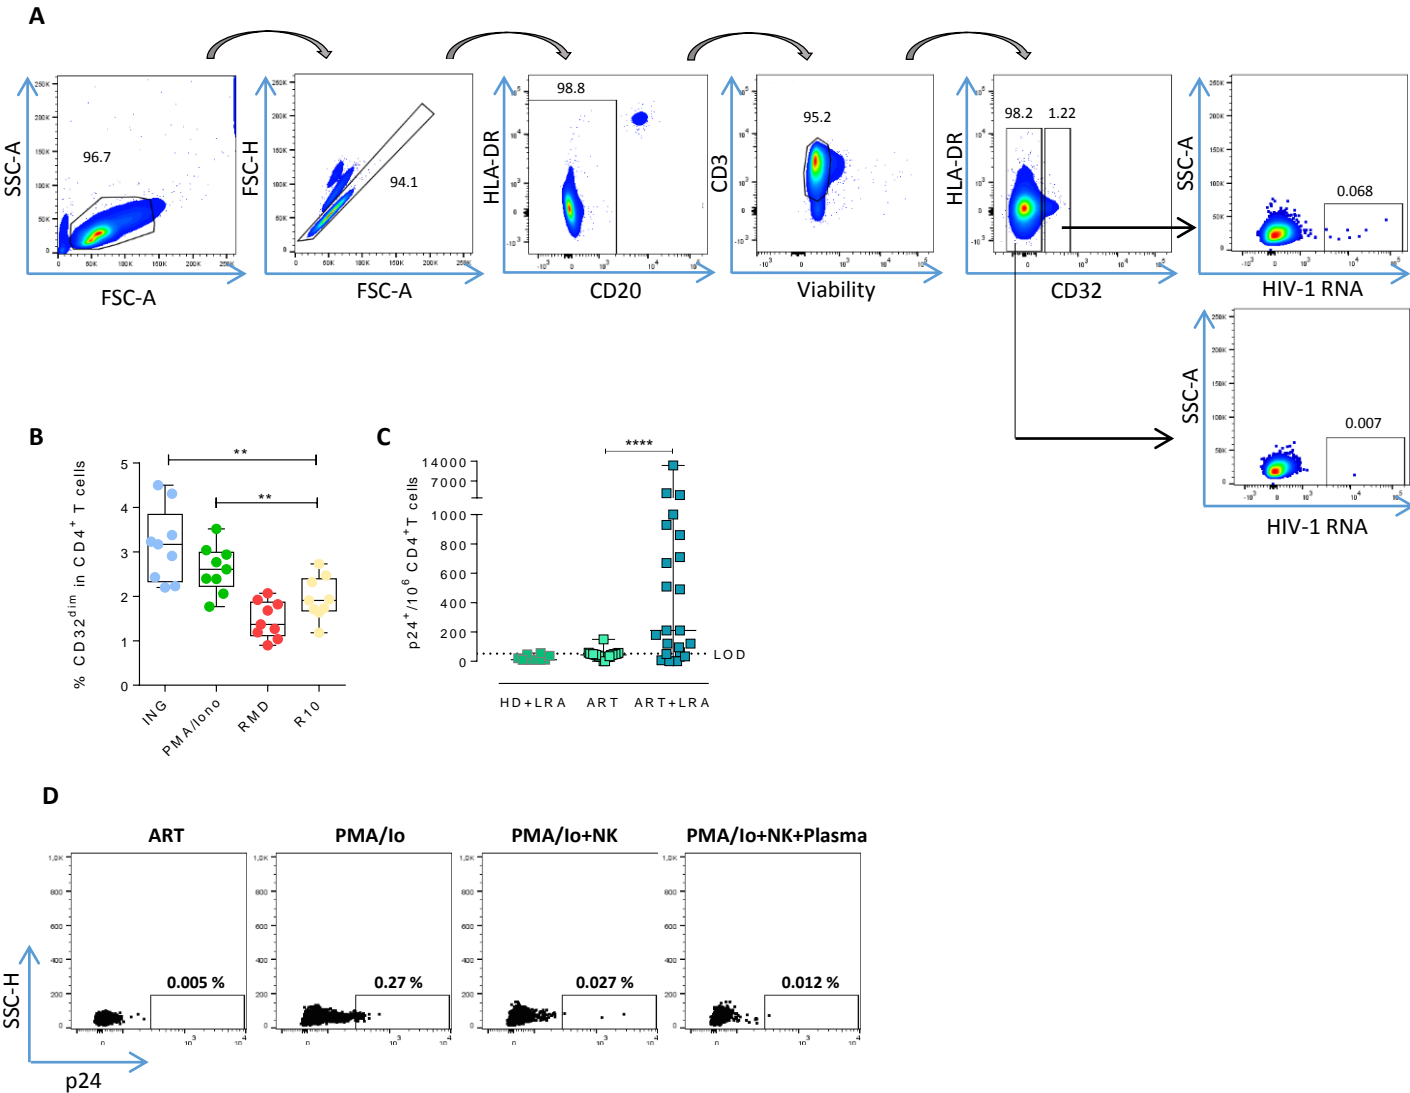

**Figure S3. Expression of HIV-RNA and viral protein p24 in  $T_{CD32}^{dim}$  reservoir cells after viral reactivation. A)** Flow cytometry gating strategy used for the identification of  $T_{CD32}^{dim}$  cells expressing HIV-RNA after the RNA FISH-flow protocol. **B)** Percentage of CD32 expression within the total CD4<sup>+</sup> T cells before and after LRA treatment, using samples from ART-suppressed PLWH subjected to RNA FISH-flow assay. Statistical comparisons consisted of the Wilcoxon matched-pairs signed-rank test. \*\* $p < 0.01$ . **C)** p24<sup>+</sup> cells in samples from ART-suppressed individuals at baseline and after viral reactivation with PMA/ionomycin (LRA). The limit of detection is set up at 53 copies/million cells calculated by the formula  $3 \times SD$  of the mean percentage of p24<sup>+</sup> cells detected in healthy donor (HD) samples. **D)** Representative flow cytometry plots of viral reactivation levels (measured as p24<sup>+</sup> cells) after LRA treatment and NK functional assays.

**Figure S4**

**A**

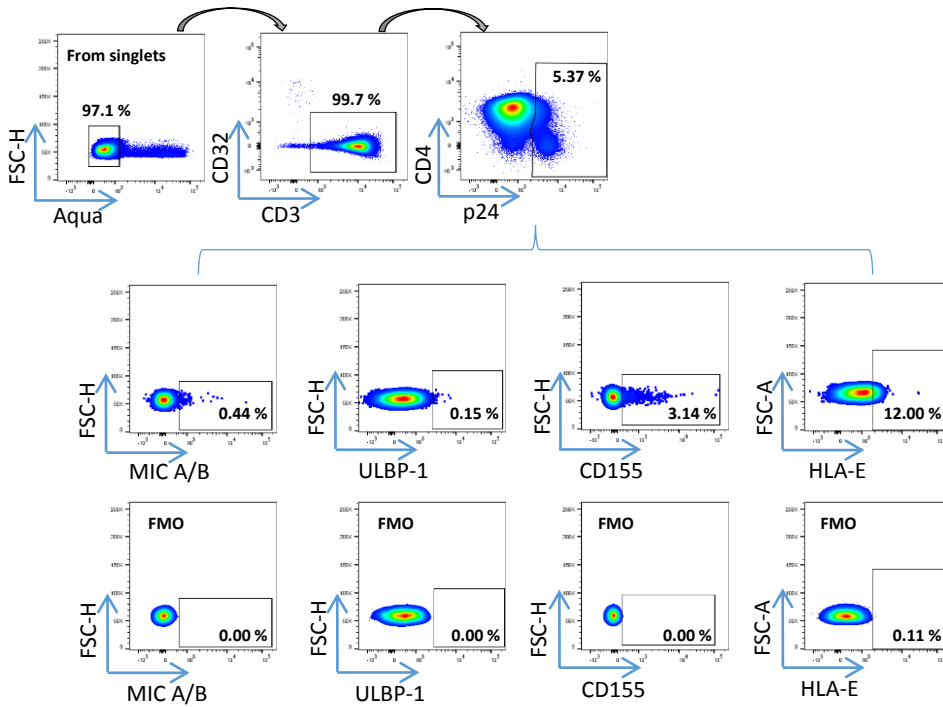

**B**

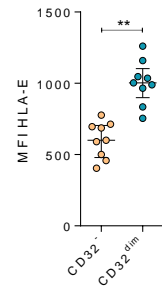

**Figure S4. NK-ligands on HIV-infected cells. A)** Representative flow cytometry gating strategy used to quantify the expression of MIC A/B, ULBP-1, CD155, and HLA-E ligands on HIV-infected cells after ex vivo infection. FMO controls are also shown. **B)** Mean Fluorescence Intensity (MFI) values of HLA-E expression on CD4<sup>+</sup> T cells in the absence of HIV infection. Median with interquartile range is shown. Statistical comparison consisted of the Wilcoxon matched-pairs signed rank test. \*\*p<0.01.

Figure S5

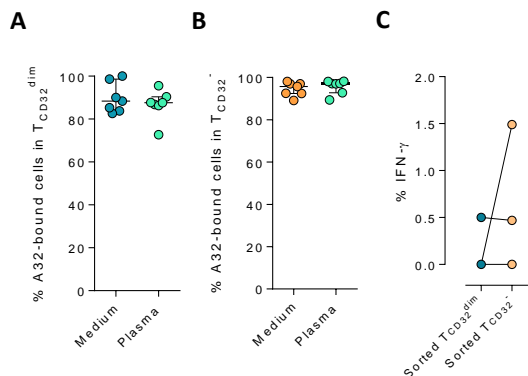

**Figure S5. Binding of A32 to T cells and percentage of IFN- $\gamma$  in cell conjugates.** The binding capability of the A32 HIV-specific antibody (APC-labeled) to gp120-coated  $T_{CD32}^{dim}$  and  $T_{CD32}^{-}$  before and after incubation with plasma containing non-HIV specific IgGs, was measured by flow cytometry. **A)** Percentage of A32 $^{+}$   $T_{CD32}^{dim}$  cells. **B)** Percentage of A32 $^{+}$   $T_{CD32}^{-}$  cells. **C)** Percentage of IFN- $\gamma$  $^{+}$  NK cells in cell conjugates with sorted  $T_{CD32}^{dim}$  and  $T_{CD32}^{-}$  cells after ADCC assays. Statistical comparisons were performed using the Wilcoxon matched-pairs signed rank test. \* $p < 0.05$ .
